# Supplementary material for: Anticipatory Postural Adjustments and kinematic arm features when postural stability is manipulated
Source: PeerJ. 2018 Mar 15;6:e4309. doi: 10.7717/peerj.4309 (PMC5857349; doi:10.7717/peerj.4309)
Supplement: Data S1 — APA final results [file peerj-06-4309-s002.xls]

## Sheet: ST
1		LAT							APA 100							APA 150							CPA
		SIT SUP CRT	SIT SUP SRT	SIT UNSUP CRT	SIT UNSUP SRT	UP CRT	UP SRT		SIT SUP CRT	SIT SUP SRT	SIT UNSUP CRT	SIT UNSUP SRT	UP CRT	UP SRT		SIT SUP CRT	SIT SUP SRT	SIT UNSUP CRT	SIT UNSUP SRT	UP CRT	UP SRT		SIT SUP CRT	SIT SUP SRT	SIT UNSUP CRT	SIT UNSUP SRT	UP CRT	UP SRT
		0.09	0.04	0.14	0.1	0.12	0.09			213.6	992.5	384.36	894.13	455.35			245.26	1042.91	350.62	1004.17	547.03			248.53	362.06	55.23	140.99	75.01
		0.09	0.05	0.09	0.03	0.14	0.12		72.69	101.1	228.61	303.19	239.08	625.68		135.23	155.65	366.74	542.97	531.08	670.28		159.76	184.79	425.79	323.48	630.92	253.07
		0.08	0.13	0.12	0.1	0.13	0.1		5.81	138.8	333.73	546.2	525.56	100.75			140.59	337.7	627.62	643.93	269.66		35.17	169.03	185.32	192.46	420.7	321.49
		0.07	0.07	0.06	0.05	0.09	0.1			17.7	402.28	294.77	192.22	434.11				555.59	79.18	221.54	936.76			71.42	492.64		420.64	800.79
		0.09	0.1	0.05	0.05	0.14	0.14		125.83	59.6	190.93	309.67	404.64	284.87		175.26	127.41	297.69	361.43	544.55	283.99		230.92	275.23	219.8	257.66	340.84	100.27
		0.14	0.09	0.14	0.06	0.07	0.13		23.16	60.03	368.06	506.47	124.95	47.97		81.39	165.62	718.79	540.21	261.76	43.79		126.96	150.35	535.82	349.02	148.19	86.9
		0.09	0.1	0.02	0.04	0.14	0.14			86.44	608.92	50.78	172.7	163.49			108.43	706.72	41.64	213.32	434.91			100.27	187.68	24.28	235.5	320.99
		0.11	0.13	0.1	0.07	0.14	0.14		177.41	72	881.81		206.78	229.99		243.06	157.44	929.08	217.08	281.34	430.17		304.58	197.4	9	358.61	152.11	277.02
		0.12	0.07	0.11	0.12	0.14	0.1		88.15		68	135.63	104.88	340.3		161.9		384.6	59.77	127.25	336.59		198.72		424.9		27.97	239.19
		0.09	0.13			0.12	0.13		24.57	29.45			108.09	150.09		27.7	46.82	593.313	313.391	50.45	166.81		69.16	1.51	315.89	222.963		244.95
2		SIT SUP CRT	SIT SUP SRT	SIT UNSUP CRT	SIT UNSUP SRT	UP CRT	UP SRT		SIT SUP CRT	SIT SUP SRT	SIT UNSUP CRT	SIT UNSUP SRT	UP CRT	UP SRT		SIT SUP CRT	SIT SUP SRT	SIT UNSUP CRT	SIT UNSUP SRT	UP CRT	UP SRT		SIT SUP CRT	SIT SUP SRT	SIT UNSUP CRT	SIT UNSUP SRT	UP CRT	UP SRT
		0.04	0.11	0.05	0.03	0.1	0.14		697.77	420.38		39.1	1114.58	547.57		584.43	368.18	97.51		1311.58	482.07			129.35	184.07		528.82	38.42
		0.07	0.09	0.11	0.13	0.11	0.1		2041.83	431.43	346.06	96.44	653.02	182.06		1972.78	418.4	434.3	546.49	672.29	246			171.69	397.17	758.53	85.33	146.6
		0.07	0.05	0.12	0.08	0.1	0.09		596.69	317.31	134.57		260.71	403.03		627.29	353.48	123.05	76.07	237.92	361.57		229.53	193.72	180.73	91.93	54.82
		0.08	0.07	0.06	0.12	0.08	0.11		834.88	1407.19	544.74	478.46	356.25	818.5		900.78	1378.64	600.35	472.35	522.84	822.67		154.9	39.98	443.6	294.43	425.39	155.8
		0.08	0.09	0.13	0.04	0.12	0.12		978.77	91.15	45.31	494.43	715.24	686.08		998.81	191.06	17.97	930.57	735.08	748.4		196.38	172.86	204.94	777.71	206.59	287.89
		0.1	0.09	0.13	0.09	0.09	0.11		980.26	252.73	759.77	274.77	260.55	699.2		1005.26	299.01	736.43	281.45	237.2	687.03		23.59	247.65	153.84	489.51	16.71	100.35
		0.1	0.13	0.05	0.08	0.14	0.1		182.87	111.59	344.78	526.02	141.65	242.67		159.09	121.38	373.85	598.24	195.5	270.06		220.94	527.13	332.08	1006.24	137.47	197.93
		0.06	0.13		0.09	0.11	0.11		176.89	75.95		755.22	323.78	281.68		253.16	12.54	340.494	830.06	329.33	267.88		294.37	39.53	270.919	584.82	243.04	69.77
		0.08	0.08		0.12		0.11		395.94	184.27		546.12		166.45		340.78	189.98		581.02	530.217	228.77		90.99	152.51		629.55	212.271	129.87
3		SIT SUP CRT	SIT SUP SRT	SIT UNSUP CRT	SIT UNSUP SRT	UP CRT	UP SRT		SIT SUP CRT	SIT SUP SRT	SIT UNSUP CRT	SIT UNSUP SRT	UP CRT	UP SRT		SIT SUP CRT	SIT SUP SRT	SIT UNSUP CRT	SIT UNSUP SRT	UP CRT	UP SRT		SIT SUP CRT	SIT SUP SRT	SIT UNSUP CRT	SIT UNSUP SRT	UP CRT	UP SRT
		0.06	0.07	0.12	0.1	0.13	0.13		51.39	169.44	4506.96	4131.41	2466.44	3387.35		126.17	173.92	5242.61	3957.9	3052.45	3844.64		178.64	-29.95	929.42	-119.68	521.28	642.41
		0.12	0.11	0.1	0.1	0.12	0.09		356.89	548.6	3412.87	3897.48	1578.66	4802.21		359.98	525.05	3451.99	3879.72	2111.95	5265.8		20.5	9.46	362.36	366.64	668.25	746.71
		0.14	0.11	0.06	0.1	0.14	0.14		123.44	168.36	2795.92	2885.26	1924.05	3583.78		71.35	170.91	3635.85	3060.6	2023.16	3513.15		48.91	40.82	934.48	-64.04	157.35	12.74
		0.09	0.08	0.11	0.07	0.13	0.14		1121.58	755.69	2006.9	2654.09	1119.44	2227.69		1181.99	876.43	2119.08	2442.53	1289.31	3335.97		72.84	160.93	163.81	-642.37	675.2	1243.23
		0.11	0.08	0.13	0.09	0.14	0.1		833.06	1637.82	1449.69	4190.8	1468.07	2205.5		894.88	1620.64	1542.28	4263.55	1816.53	2780.45		328.32	151.06	265.37	264.13	495.37	751.47
		0.12	0.14	0.09	0.13	0.13	0.13		1095.53	197.73	3130.58	2743.42	958.47	3892.53		1049.72	248.02	3242.25	2686.91	1101.77	4607.54		41.61	190.74	635.84	-36.59	148.31	741.47
		0.11	0.09	0.05	0.08	0.1	0.11		663.37	1326.89	2764.87	3309.61	1933.87	2810.26		698.79	1409.67	2994.84	3015.99	2114.43	3165.25		293.79	161.81	321.17	-1125.62	493.01	459.55
		0.12	0.1	0.11	0.11	0.11	0.12		609.49	507.4	5655.97	4682.72	2561.55	1455.93		671.3	542.71	5620.73	4673.12	2575.13	2139.11		259.06	180.33	-452.48	-127.64	28.68	788.14
			0.11	0.09	0.06	0.12	0.13		606.844	722.17	2845.23	3229.97	1299.83	2933.42		631.773	764.4	2679.44	3081.17	1326.64	2906.91		155.459	207.49	-753.77	-185.45	69.92	4.81
					0.1		0.11			670.456	3174.33	2190.53	1701.15	1546.43			703.528	3392.12	2302.13	1934.6	3320.72			119.188	267.356	133.42	361.93	1854.94
4		SIT SUP CRT	SIT SUP SRT	SIT UNSUP CRT	SIT UNSUP SRT	UP CRT	UP SRT		SIT SUP CRT	SIT SUP SRT	SIT UNSUP CRT	SIT UNSUP SRT	UP CRT	UP SRT		SIT SUP CRT	SIT SUP SRT	SIT UNSUP CRT	SIT UNSUP SRT	UP CRT	UP SRT		SIT SUP CRT	SIT SUP SRT	SIT UNSUP CRT	SIT UNSUP SRT	UP CRT	UP SRT
		0.04	0.04	0.14	0.14	0.13	0.1			55.4	413.88	373.32	5773.57	1764.39		1.53	149.88	574.92	468.87	5901.8	3613.5		149.4	260.44	72.05	188.55	409.15	2093.51
		0.07	0.04	0.06	0.02	0.08	0.09		144.77	201.43	673.94	367.34	4624.66	2346.47		194.39	172.5	884.78	162.15	5615.97			210.22	33.84	502.03	-95.99	1077	4095.08
		0.11	0.09	0.1	0.09	0.08	0.11		188.71	84.54	484.76	300.94	3347.23	1261.65		127.79	96.38	576.17	339.1	5471.49	4233.35		175.54	271.42	222.41	346.23	2176.58	3333.85
		0.05	0.07	0.07	0.06	0.11	0.08		0.87	118.63	893.37	185.38	3937.3	1706.13		74.78	161.5	1064.13	581.72	4602.11	2541.74		228.96	145.26	510.67	472.51	779.86	954.64
		0.11	0.09	0.08	0.03	0.09	0.1				737.13	81	2030.87				285.47	695.6	290.23	2453.95			-0.04	510.81	-116.51	322.87	386.91	3098.56
		0.12	0.11	0.06	0.03	0.13	0.09		73.87	97.95	421.76	201.56	512.02	3924.49		98.58	215.46	723.35	239.55	506.13			169.28	210.36	388.12	233.34	3047.97	2782.76
		0.09	0.05	0.08	0.13	0.14	0.03		133.72	22.86	1111.38	214.71	4209.81			187.66	52.52	1648.16	359.92	4335.95			189.66	74.75	947.85	203.42	4767.5	1329.42
		0.05	0.08	0.12	0.09	0.14	0.03		48.1	40.29	1066.72	-9.18	3788.74	1759.08		133.87	41.23	1306.86	44.93	4110.87	1904.59		217.74	-26.05	668.85	7.79	2572.5	194.07
		0.04	0.1		0.07		0.11			85.68	725.368	178.2	3528.02	2441.48			164.72	934.246	264.17	4124.78	2604.77		-4.94	309.8	399.434	263.22	1902.18	286.56
		0.04	0.07		0.09		0.14		91.89	107.71		272.08				187.18	-38.04		329.81				257.31	59.17		233.12		1083.42
5		SIT SUP CRT	SIT SUP SRT	SIT UNSUP CRT	SIT UNSUP SRT	UP CRT	UP SRT		SIT SUP CRT	SIT SUP SRT	SIT UNSUP CRT	SIT UNSUP SRT	UP CRT	UP SRT		SIT SUP CRT	SIT SUP SRT	SIT UNSUP CRT	SIT UNSUP SRT	UP CRT	UP SRT		SIT SUP CRT	SIT SUP SRT	SIT UNSUP CRT	SIT UNSUP SRT	UP CRT	UP SRT
		0.05	0.07	0.08	0.07	0.09	0.13		1028.44	644.86	-18.63	402.19	1672.35	1754.71		1033.76	1320.36	811.98	457.56	2633.49	1735.74		112.11	773.31	2091.76	230.55	920.89	-39.37
			0.08	0.08	0.13	0.1	0.1			126.34	1404.52	795.28	1527.9	2011.36			120.94	2185.87	776.19	1579.84	2655.65			34.53	750.58	204.47	164.34	803.29
		0.07	0.12	0.13	0.09		0.1		1069.64	502.14	790.43	937.66		1922.66		1266.07	551.22	686.64	1319.81		2166.35		323.24	96.86	-83.81	148.87		411.6
		0.1	0.04	0.06	0.13	0.13	0.1		918.29	420.89	723.44	668.96	1678.2	794.75		914.87	418.57	2287.55	2300.8	1585.58	809.53		71.36	204.69	1773.54	1651.81	-127.43	221.33
		0.13	0.1	0.11	0.08	0.12	0.13		191.18	1173.97		2379.8	2313.9	1993.36		188.99	1158.04		3504.82	2319.93	1966.66		-8.46	9.05		1812.92	184.73	103.29
		0.1	0.11	0.12	0.12	0.14	0.09		339.48	444.21	1088.25	1776.6	360.21	813.91		354.25	486.96	1279.03	1806.91	416.86	795.78		61.09	158.42	213.51	-141.35	127.55	-2.86
		0.13	0.11	0.13	0.14	0.1	0.14		186.71	344.32	737.57	1442.57	3617.47	1174.38		247	384.79	989.46	1411.91	3636.92	1134.57		37.28	118.98	326.73	41.45	54.73	-33.85
		0.08	0.06	0.05	0.07	0.13	0.14		339.21	501	2695.23	1621.34	2140.49	2420.22		378.28	723.24	2848.02	2025.43	2138.42	2392.64		210.04	464.86	348.18	1011.92	158.64	103.39
		0.08	0.1		0.12	0.1	0.13		251.46	388.69		675.69		1005.64		185.74	407.16		823.96		1045.22		11.26	184.89		518.88		348.19
		0.1	0.12		0.09		0.13		679.87	1020.22	122.4	890.19	729.55	1136.96		614.97	1004.44	274.9	1140.54	738.75	1195.75		135.26	99.01	492.8	241.28	302.86	182.71
6		0.1	0.06	0.06	0.1	0.13	0.09			113.42	1919.54	1224.86	3821.07	1650.92		21.98	256.65	2563.79	1801.22	4171.18	1740.04		14.41	206.11	836.84	1813.39	384.6	227.05
		0.12	0.1	0.1	0.13	0.13	0.14		67.87	178.71	1862.46	928.35		1588.01		140.57	233.05	2059.55	1230.78	5936.41	1557.44		174.75	145.41	771.56	294.18	1344.49	93.65
		0.09	0.06	0.09	0.07	0.14	0.08		162.46	77.63	935.9	824.89	1251.2	2107.77		190.01	68.48	858.57	889.64	1316.34	2757.06		188.16	74.49	-574.11	139.94	5812.22	772.78
		0.07	0.09	0.06	0.06	0.1	0.08		374.87	347.64	1766.53	1095.68	1489.53	1290.55		361.06	322.21	1937.81	1204.23	1794.65	1788.74		-17.46	34.7	-82.62	282.49	327.45	595.81
		0.07	0.11	0.08	0.07	0.07	0.11		134.48	452.44	1241.59	1284.51		1477.71		132.25	559.34	1115.47	1828.53	6850.61	2060.53		98.35	242.45	-95.92	148.88	300.15	536.63
		0.08	0.09	0.1	0.07	0.11	0.14		195.38	249.42	1690.6	618.5	2503.22	2122.32		226.99	296.16	1726.94	854.22	2578.87	2070.26		113.57	272.74	1895.8	30.54	156.13	-121.11
		0.09	0.11	0.11	0.12	0.13	0.08		221.25	53.49	1842.32	617.21	2039.99	2845.77		369.89	177.72	1596.98	473.92	2594.42	2852.69		353.34	223.44	-855.45	179.96	412.59	164.32
		0.11	0.13	0.05	0.1	0.12	0.11		139.24	281.06	2739.06	1415.69	1101.45	1725.44		235.48	315.66	3182.33	2160.85	1128.87	1878.88		213.24	65.81	866.49	1080.78	117.45	391.37
			0.12		0.05	0.1	0.12		185.079	342.12	1749.75	827.92	2083.53	3823.3		209.779	422.32	1880.18	312.28	2214.18	4352.87		142.295	430.78	345.324	-1232.44	85.69	636.78
			0.1		0.07	0.11	0.11			539.91		1580.06	2288.59	1676.1			515.5		2101.3	3102.37	1708.9			-25.37		892.47	807.05	-119.12
7		SIT SUP CRT	SIT SUP SRT	SIT UNSUP CRT	SIT UNSUP SRT	UP CRT	UP SRT		SIT SUP CRT	SIT SUP SRT	SIT UNSUP CRT	SIT UNSUP SRT	UP CRT	UP SRT		SIT SUP CRT	SIT SUP SRT	SIT UNSUP CRT	SIT UNSUP SRT	UP CRT	UP SRT		SIT SUP CRT	SIT SUP SRT	SIT UNSUP CRT	SIT UNSUP SRT	UP CRT	UP SRT
		0.05	0.02	0.1	0.07	0.11	0.11		46.83	64.61	78.1	56.91	1879.2	2086.81		9.42	76.34	71.86	95.82	3149.55	3780.02		28.46	10.75	126.58	163.73	1173.29	1954.17
		0.08	0.09	0.11	0.1	0.14	0.13		-5.66	-45.63	158.19	26.12	152.87	2654.96		40.9	-84.05	201.1	-9.7	228.42	3094.43		119.23	-41.39	208.42	-24.28	292.79	583.37
		0.1	0.06	0.1	0.09	0.13	0.13		141.15	79.53	-25.53	-0.54	884.83	2340.62		174.95	62.59	-68.51	-26.48	1709	3596.61		228.28	99.53	-113.23	-52.78	1222.14	1270.99
		0.09	0.11	0.11	0.05	0.13	0.1		-17.6	111.26	33.97	169.05	2777.55	287.23		7.26	185.03	154.2	159.38	3401.65	398.41		56.21	225.1	252.53	10.5	550.86	340.43
		0.11	0.11	0.1	0.07	0.14	0.13		53.63	77.71	212.86	189.5	4192.02	1413.9		71.87	88.76	313.22	275.06	4768.81	1790.99		188.19	129.38	254.27	233.02	974.48	476.38
		0.12	0.07	0.13	0.12	0.13	0.14		107.86	-52.06	-11.04	-4.82	1957.88	1726.79		193.74	-114.71	67.92	-8.94	2338.11	2080.94		279.62	-156.32	38.63	-28.02	639.43	460
			0.09	0.12	0.11	0.13	0.08			129.59	106.35	71.22	3199.9	345.76			194.78	169.87	119.23	3347.05	1011.05			249.71	67.12	182.4	298.5	702.38
				0.13	0.11		0.13				266.68	161.12		1164.12				255.39	158.84		1294.02				106.36	119.75		256.11
				0.14	0.12		0.12				191.67	228.26		3965.04				323.4	297.23		5140.99				134.59	286.12		1256.29
8		SIT SUP CRT	SIT SUP SRT	SIT UNSUP CRT	SIT UNSUP SRT	UP CRT	UP SRT		SIT SUP CRT	SIT SUP SRT	SIT UNSUP CRT	SIT UNSUP SRT	UP CRT	UP SRT		SIT SUP CRT	SIT SUP SRT	SIT UNSUP CRT	SIT UNSUP SRT	UP CRT	UP SRT		SIT SUP CRT	SIT SUP SRT	SIT UNSUP CRT	SIT UNSUP SRT	UP CRT	UP SRT
		0.01	0.07	0.11	0.07	0.11	0.13		42.24	13.04	120.31	94.67	32.46	126.48		-26.38	-8.55	133.69	135.28	80.85	129.13		-54.39	32.48	114.2	140.9	118.35	144.88
			0.08	0.13		0.12	0.1			75.41	198.74		197.13	73.99			137.51	229.05		267.14	70.72			205.49	241.97		310.54	114.37
		0.01	0.14		0.1	0.07	0.11		-44	182.15		76.27	117.34	75.04		-66.4	171.26		98.06	11.17	82.65		-170.76	151.55		101.5	-186.07	71.09
		0.1		0.07	0.09	0.09	0.08		183.24		117.8	133.26	15.13	134.22		256.47		170.76	242.19	11.87	186.51		310.75		466.09	326.31	6.07	200.54
		0.12	0.08	0.11	0.09	0.09	0.13		40.45	89.6	9.57	-1.33	67.11	157.13		53.97	118.93	-25.49	207.06	141.11	168.18		67.43	191.18	33.04	219.53	203.21	89.12
			0.09	0.11	0.13	0.1	0.06			97.37	-40	104.01	3.6	156.12			172.07	-33.14	63.89	21.92	199.42			255.38	-22.51	72.56	-9.52	193.08
		0.12	0.13	0.1	0.09	0.07	0.06		124.52	104.49	124.82	207.23	127.12	-29.76		157.78	153.08	135.84	274.96	165.22	-49.06		233.19	225.67	271.14	262.86	217.54	46.86
		0.1		0.06	0.13	0.08	0.08		-86.24		-0.64	65.07	1.13	-54.64		-108.05		74.2	83.92	40.08	38.32		-111.36		220.32	196.13	127.3	70.82
		0.05	0.13	0.03	0.03	0.07	0.07		93.44	156.89	-114.64	98.75	64.59	27.32		152.21	240.59	76.9	135.8	142.53	24.24		213.77	232.28	160.8	172.58	222.99	36.53
			0.03	0.05	0.05					141.77	45.66	76.55					169.72	77.58	-38.2					214.23	143.25	3.42
9		SIT SUP CRT	SIT SUP SRT	SIT UNSUP CRT	SIT UNSUP SRT	UP CRT	UP SRT		SIT SUP CRT	SIT SUP SRT	SIT UNSUP CRT	SIT UNSUP SRT	UP CRT	UP SRT		SIT SUP CRT	SIT SUP SRT	SIT UNSUP CRT	SIT UNSUP SRT	UP CRT	UP SRT		SIT SUP CRT	SIT SUP SRT	SIT UNSUP CRT	SIT UNSUP SRT	UP CRT	UP SRT
		0.1	0.11	0.03	0.03	0.13	0.07		141.32	61.98	329.25	95.98	1525.85	779.95		112.54	54.41	388.55	421.72	1546.94	824.05		-45.53	81.63	198.21	506.02	90.66	60.87
		0.12	0.08		0.08	0.14	0.12		139.99	110.45		-55.56	284.45	515.77		254.09	122.39		-90.95	296	541.62		301.03	150.04	-965.83	-102.27	110.3	146.67
		0.07	0.12	0.13	0.01	0.13	0.14		160.83	141.82	105.12	271.26	445.59	803.2		245.37	237.52	3.21	519.31	955.26	949.82		322	292.16	220.62	681.67	623.76	214.89
		0.12	0.08			0.14	0.11		82.83	139.22			430.04	499.11		47.92	166.29			610.77	846.65		33.76	214.24	-24.34	559.32	414.21	491.8
		0.1	0.05		0.13	0.11	0.06		-9.36	17.19		91.28	445.87	28.32		-34.59	48.79		164.78	1266.38	114.98		-129.17	79.53	-810.66	155.54	1174.66	119.96
		0.13	0.11	0.1	0.03		0.14		178.82	8.24	699.58	-1.61		468.47		233.68	-11.25	782.81	161.18		532.09		260.22	-108.56	255.6	70.64	-331.85	277.58
		0.1	0.08	0.01		0.13	0.07		48.68	118.67	56.82		1119.44	51.12		63.37	133.14	-105.73		1206.32	271.56		-2.02	38.76	-336.18	90.4	247.24	225.08
		0.11	0.08			0.1	0.14		39.96	159.99			646.47	432.81		97.81	180.5			810.39	480.91		203.46	168.35	-630.81	-239.72	373.1	107.5
		0.11	0.12	0.11	0.12		0.11		127.2	77.6	72.52	198.19		1631.64		214.28	87.93	212.5	341.17		1591.55		199.85	86.67	485.23	134.18	-320.51	49.13
		0.13	0.11		0.01	0.13	0.09		152.98	27.66		167.52	311.71	377.84		168.66	89.12		467.97	329.71	669.05		68.71	99.86	-141.16	362.66	33.86	297.73
10		SIT SUP CRT	SIT SUP SRT	SIT UNSUP CRT	SIT UNSUP SRT	UP CRT	UP SRT		SIT SUP CRT	SIT SUP SRT	SIT UNSUP CRT	SIT UNSUP SRT	UP CRT	UP SRT		SIT SUP CRT	SIT SUP SRT	SIT UNSUP CRT	SIT UNSUP SRT	UP CRT	UP SRT		SIT SUP CRT	SIT SUP SRT	SIT UNSUP CRT	SIT UNSUP SRT	UP CRT	UP SRT
		0.11	0.03	0.13	0.11	0.11	0.11		204.96	-4.55	-139.99	190.85	4411.95	5783.74		276.89	49.9	-6.57	867.41	4457.77	9303.64		242.08	72.48	133.67	810.4	537.93	3065.4
			0.13	0.13	0.08	0.09	0.12			10.46	528.25	692.24	5372.78	4844.51			7.04	553.85	727.17	5800.58	4852.29			51.52	157.44	180.64	500.84	-41.26
		0.02	0.12	0.14	0.09		0.08		97.86	54.07	292.33	118.29		6663.45		163.31	102.57	442.5	273.13		6654.4		248.7	224.41	352.58	163.78		385.61
			0.13		0.14	0.13	0.12			296.82		660.78	7870.32	4662.94			416.39		695	8239.95	4715.4			428.54		38.86	596.07	282.58
			0.08	0.13	0.13	0.13	0.08			73.46	224.21	74.54	5069.21	3971.3			84.09	268.18	81.38	7037.14	3984.01			130.98	145.42	118.07	2088.62	-984.03
		0.11	0.11		0.1	0.11	0.13		-3.85	-57.73		8.64	2030.81	11120.2		76.79	-76.33		60.39	2931.03	11558		127.52	-14.78		267.62	933.5	659.68
		0.11	0.13	0.12	0.14	0.04	0.12		-53.41	2.19	394.91	116.55	5662.88	4613.84		-105.67	-58.06	317.94	220.27	5934.57	4567.2		-132.4	-29.92	-86.1	343.38	868.22	-777.92
		0.09	0.12	0.11	0.13	0.11	0.1		145.25	112.1	1044.63	363.15	1699.06	6622		191.35	168.87	1112.49	416.65	2751.43	6852.04		131.08	132.42	396.8	134.52	1664.91	1262.88
			0.12		0.1	0.14	0.14			91.64		169.78	6628.51	4022.45			189.91		58.86	6731.86	4780.23			151.77		-68.3	2471.6	1991.78
		0.09	0.11	0.13	0.14	0.14	0.12		-66.93	-17.85	495.64	24.54	3459.46	7149.69		-124.6	-11.59	577.41	29	4354.73	7149.59		-267.98	45.09	298.95	63.94	1088.71	602.15

## Sheet: TA (2)
		SIT SUP CRT	SIT SUP SRT	SIT UNSUP CRT	SIT UNSUP SRT	UP CRT	UP SRT		SIT SUP CRT	SIT SUP SRT	SIT UNSUP CRT	SIT UNSUP SRT	UP CRT	UP SRT		SIT SUP CRT	SIT SUP SRT	SIT UNSUP CRT	SIT UNSUP SRT	UP CRT	UP SRT		SIT SUP CRT	SIT SUP SRT	SIT UNSUP CRT	SIT UNSUP SRT	UP CRT	UP SRT
		0.02	0.05	0.13	0.11	0.04	0.07		51.79	99.03	131.11	204.51	-38.47	188.41		65.89	73.82	306.01	267.77	2.42	204.31		86.23	131.2	641.17	687.43	29.69	162.2
		0.06	0.13	0.1	0.04	0.12	0.09		86.14	126.72	68.67	67.2	115.45	110.93		141.17	201.25	125.55	107	140.82	184.18		136.9	220.55	433.65	176.07	149.6	257.73
		0.11	0.13	0.09	0.14	0.05	0.01			126.08	9.52	72.32	196.31	102.13			157.96	113.06	105.17	317.67	144.28		8.5	174.64	354.29	117.82	368.33	226.05
		0.06	0.14	0.08	0.11	0.12	0.11		129.74	57.33	291.03	95.69	110.48	14.32		188.22	83.51	468.89	162.26	204.58	10.88		245.23	149.05	966.98	253.88	256.56	104.26
		0.08	0.06	0.08		0.12	0.12		122.97	176.12	201.42		77.2			73.19	244.16	250.21		92.08	6.94		47.56	278.55	719.72		37.25	27.33
			0.11	0.14			0.06			304.13	102.78			114.14			332.81	150.03			163.91			311.5	719.55			219.08
			0.13							27.3							141							233.51
			0.11							70.41							163.91							276.51
			0.13							104.52							157.97							237.45
			0.07							173.31							223.31							160.42
		SIT SUP CRT	SIT SUP SRT	SIT UNSUP CRT	SIT UNSUP SRT	UP CRT	UP SRT		SIT SUP CRT	SIT SUP SRT	SIT UNSUP CRT	SIT UNSUP SRT	UP CRT	UP SRT		SIT SUP CRT	SIT SUP SRT	SIT UNSUP CRT	SIT UNSUP SRT	UP CRT	UP SRT		SIT SUP CRT	SIT SUP SRT	SIT UNSUP CRT	SIT UNSUP SRT	UP CRT	UP SRT
		0.01	0.08	0.11	0.03	0.05	0.07				164.87	83.6	-25.54	22.56				247.18	102.58	-46.4	92.34		1528.26	86.66	1040.96	131.25	28.8	174.22
		0.03	0.05	0.04	0.09	0.05	0.03				64.73	68.46	67.04	103.7				104.6	79.91	316.28	170.27		988.42	651.72	2144.09	121.01	547.66	281.06
				0.12	0.07	0.04	0.09				183.03	31.77	107.5	138.12				546.77	33.36	140.08	180.58			2033.66	2224.09	507.23	291.91	246.48
				0.03	0.12	0.04	0.08				60.2	27.54	15.19	215.62				70.36	43.28	52.02	489.3			882.76	687.09	510.98	101.5
					0.13	0.07	0.04					75.74	141.07	115.98					138.51	225.54	147.97			1561.85		1004.49	306.49	165.59
					0.11	0.13	0.05						18.82	61.83						23.06	68.06			636.31		39.44	126.66	52.93
					0.12		0.06							61.82					210.88		81.88			572.07		2577.36		97.98
							0.02							62.84							116.93			308.08				165.67
		SIT SUP CRT	SIT SUP SRT	SIT UNSUP CRT	SIT UNSUP SRT	UP CRT	UP SRT		SIT SUP CRT	SIT SUP SRT	SIT UNSUP CRT	SIT UNSUP SRT	UP CRT	UP SRT		SIT SUP CRT	SIT SUP SRT	SIT UNSUP CRT	SIT UNSUP SRT	UP CRT	UP SRT		SIT SUP CRT	SIT SUP SRT	SIT UNSUP CRT	SIT UNSUP SRT	UP CRT	UP SRT
		0.12	0.1	0.11	0.11	0.05	0.07		167.38	45.86	185.63	75.32	164.77	73.25		242.53	47.07	298.6	112.27	371.33	128.45		356.76	147.69	421.19	165.87	636.32	162.12
		0.09	0.05	0.1	0.12	0.07	0.14		95.44	31.29	71	101.95	213.46			141.98	82.9	85.07	152.96	387.76			184.78	1983.93	58.97	262.86	593.3	320.97
		0.13	0.09	0.11	0.13	0.11	0.04		120.12	31.12	93.76	54.13	87.12	270.71		175.2	34.48	138.01	103.39	123.09	375.12		377.86	1276.43	218.32	98.97	321	278.95
		0.09	0.13	0.06	0.12	0.07			85.58		64.86	81.23	248.72	157.34		124.53		103.15	138.42	395.06	341.94		131.07		144.45	121.01	606.09	390.35
		0.1	0.13	0.12	0.12	0.05	0.09		76.37	722.11	204.67	97.16	172.58	303.27		197.51	835.48	291.47	128.36	393.4	526.57		230.84	6324.64	302.38	130.34	601	397.07
			0.12	0.13	0.08	0.1	0.14				123.59	53.63		97.37				180.51	99.76		202.45			2089.87	233.16	155.01		145.71
			0.09		0.13	0.09	0.02			37.13	11.73	75.46	320.07	96.12			74.83	-10.77	144.5	474.81	270.61		427.77	2299		145.63	289.04	410.46
				0.07	0.07	0.09	0.02				64.04	16.5	908.31	143.92				79.41	-0.05	1098.44	687.11				26.83		622.95	595.74
				0.12	0.04						145.37	23.49						223.04	39.71						309.58	25.88
		SIT SUP CRT	SIT SUP SRT	SIT UNSUP CRT	SIT UNSUP SRT	UP CRT	UP SRT		SIT SUP CRT	SIT SUP SRT	SIT UNSUP CRT	SIT UNSUP SRT	UP CRT	UP SRT		SIT SUP CRT	SIT SUP SRT	SIT UNSUP CRT	SIT UNSUP SRT	UP CRT	UP SRT		SIT SUP CRT	SIT SUP SRT	SIT UNSUP CRT	SIT UNSUP SRT	UP CRT	UP SRT
		0.09	0.04	0.07	0.1	0.13	0.13		-24.83	117.34	153.98	57.37	106.51	66.7		343.15	82.98	220.55	89.76	437.66	47.15		1589.26	787.82	397.89	95.86	829.48	930.81
		0.06	0.12	0.06	0.11	0.11	0.01		205.82	80.91	147.29	106	43.07	56.01		851.71	205.93	227.12	125.95	156.65	119.81		1532.61	1020.66	321.61	152.72	3659.63	833.66
		0.04	0.03	0.06	0.11	0.04	0.07		49.36	74.26	-58.2	6.86	-6.87	172.12		69.36	111.74	-58.24	-9.8	478.85	250.19		448.83	572.01	-67.59	-29.24	1388.36	1142.16
		0.09	0.07	0.07	0.02	0.08	0.09		96.68	21.98	76.52	113.48	259.75	164.65		222.68	28.63	117.92	156.41	719.45	259.1		689.77	144.93	181.48	185.77	1948.81	941.33
		0.08	0.05		0.13	0.07	0.13		-0.81	71.52		41.28	-112.79	110.8			91.5		46.77	-61.26	347.21		526.82	357.73		-16.54	1544.4	633.6
		0.09	0.12		0.14	0.13			3.88	34.01		137.82	248.21	-6.72		135.59	217.88		195.48	441.01	252.24		345.26	549.01		250.45	608.42	657.15
		0.14	0.1		0.12	0.11			174.44	134.89		32.41	-27.96			671.1	221.69		8.69	126.31			790.6	587.01		-6.07	357.61
		0.13	0.11		0.08				48.38	93.39		40.17	706.63			196.58	583.16		70.78	1655.71			332.47	1114.77		47.15	1783.82
		0.13	0.04						118.91	47.81						166.3	235.49						507.31	503.7
		SIT SUP CRT	SIT SUP SRT	SIT UNSUP CRT	SIT UNSUP SRT	UP CRT	UP SRT		SIT SUP CRT	SIT SUP SRT	SIT UNSUP CRT	SIT UNSUP SRT	UP CRT	UP SRT		SIT SUP CRT	SIT SUP SRT	SIT UNSUP CRT	SIT UNSUP SRT	UP CRT	UP SRT		SIT SUP CRT	SIT SUP SRT	SIT UNSUP CRT	SIT UNSUP SRT	UP CRT	UP SRT
		0.02	0.07	0.04	0.14	0.03	0.14		188.96	79.95	31.13	196.68	3105.3	101.24		219.31	107.78	14.83	246.78	4487.61	255.94		2444.05	223.48	41.27	250.21	1679.47	802.78
		0.09	0.11	0.08	0.1	0.08	0.07		726.58	894.05	34.11	149.46	3315.3	143.71		987.96	-42.46	59.53	201.5	3622.04	269.16		4624.81	-2970.2	77.2	229.26	569.46	372.56
		0.12	0.1	0.05	0.06	0.03	0.09		2054.35	254.14	18.82	83.18	3919.99	710.24		1984.69	295.37	45.13	154.22	4000.7	1008.45		8257.39	5462.8	-69.81	278.01	2633.25	667.03
		0.11	0.13	0.11	0.06	0.11	0.08		767.18	3838.97	138.8	89.96	3657.32	5173.04		149.46	3892.7	191.06	120.62	3716.87			1628.43	4402.08	178.48	144.41	2053.05	746.85
		0.13	0.1	0.12	0.12	0.1	0.1		2179.05	278.26	124.32	11.09	69.8	1689.8		2442	232.9	191.15	18.69	149.61	1776.68		1152.52	4911.38	255.15	-1.21	506.11	239.53
		0.11	0.06		0.12	0.12	0.03		979.97	459.4		55.38	3034.91	8067.92		906.2	542.95		75.48	3163.67			2704.81	2970.79		107.09	335.39	625.03
		0.12	0.12		0.08	0.11	0.1		3862.31	144.11		-0.6	654.4	1771.83		4418.01	325.65		10.86	730.66	1819.8		11424.5	4100.6		46.38	318.43	181.39
		0.12	0.05		0.01	0.1	0.05		3614.19	87.15		58	2845.38	3590.87		4300.18	87.64		71.51	3314.66	3770.71		5278.86	1687.69		139.77	814.86	333.77
		0.1	0.11						1335.52	406.37						993.36	631.52						4161.9	4333.25
			0.13							585.02							616.24							4039.73
		SIT SUP CRT	SIT SUP SRT	SIT UNSUP CRT	SIT UNSUP SRT	UP CRT	UP SRT		SIT SUP CRT	SIT SUP SRT	SIT UNSUP CRT	SIT UNSUP SRT	UP CRT	UP SRT		SIT SUP CRT	SIT SUP SRT	SIT UNSUP CRT	SIT UNSUP SRT	UP CRT	UP SRT		SIT SUP CRT	SIT SUP SRT	SIT UNSUP CRT	SIT UNSUP SRT	UP CRT	UP SRT
		0.07	0.08	0.07	0.04	0.08	0.05		217.52	179.68		146.24	2041.79	1024.48		223.18	234.3	116.06	206.38	2316.32	1069.6		-55.09	294.37	-102.1	288.16	323.94	259.46
		0.06	0.06	0.13	0.01	0.06	0.08		127.15	709.24	186.81	331.89	542.64	766.73		197.54	710.84	324.44	442.9	654.33	933.43		212.72	106.62	386.84	399.02	256.01	244.66
		0.09	0.11	0.13	0.02	0.13	0.14		95.41	373.4	32.35	20.1	-24.24	547.56		151.61	425.46	112.83	75.5	13.04	607.38		207.24	165	181.1	71.49	825.09	254.05
		0.08	0.13	0.14	0.12	0.06	0.04		99.89	255.91	23.23	175.46	2015.22	994.89		57.9	277.4	12.28	293.59	2124.64	1093.4		-82.6	185.31	47.73	-146.81	533.88	291.48
		0.06	0.14	0.02	0.14	0.07	0.1		193.43	67.72	73.24	53.09	1427.55	485.99		249.05	29.17	157.78	191.24	1767.01	624.95		223.51	-36.99	207.57	375.04	729.85	404.33
		0.1	0.11	0.03	0.08	0.11	0.07		234.51	486.81	102.11	88.65	669.69	460.38		220.32	535.71	160.46	-4.59	802.35	536.15		-8.83	208.86	191.02	-68.74	349.28	159.25
		0.1	0.13		0.11	0.12	0.05		234.34	275.69	165.55	111.18	1860.14	1558.55		358.46	288.3	218.08	286.21	2096.67	1500.41		413.96	132.85	282.3	375.77	328.86	-17.73
		0.11	0.1		0.08	0.13	0.06		308.45	120.03			444.48	502.94		351.94	239.4			613.26	648.66		137.89	142.75		-864.45	316.3	247.06
			0.12			0.05	0.07			107.77			1462.22	1299.38			85.88			1789.58	1458.66			-47.08			546.62	278.37
						0.07	0.1						1243.36	819.11						1374.5	850.35						164.03	159.99
		SIT SUP CRT	SIT SUP SRT	SIT UNSUP CRT	SIT UNSUP SRT	UP CRT	UP SRT		SIT SUP CRT	SIT SUP SRT	SIT UNSUP CRT	SIT UNSUP SRT	UP CRT	UP SRT		SIT SUP CRT	SIT SUP SRT	SIT UNSUP CRT	SIT UNSUP SRT	UP CRT	UP SRT		SIT SUP CRT	SIT SUP SRT	SIT UNSUP CRT	SIT UNSUP SRT	UP CRT	UP SRT
		0.07	0.13	0.13	0.09	0.06	0.05		40.1	25.54	375.61	78.58	91.44	-10.23		44.99	37.31	414.45	112.91	151.77	-17.65		127.64	63.47	344.06	126.69	209.04	15.75
		0.06	0.08	0.04	0.09	0.04	0.11		73.19	77.16	-346.81	129.9	48.85	-35.39		90.94	88.94	-864.52	201.86	60.34	-53.95		133.39	152.69	-1461.9	181.85	45.21	-137.61
		0.06	0.04	0.13	0.08	0.07	0.07		137.01	91.6	331.94	42.19	83.52	57.77		192.74	159.33	434.29	52.68	155.29	85.17		254.18	199.91	66.01	91.11	268.67	81.76
		0.11	0.12	0.06	0.07	0.13	0.03		-29.7	-29.87	716.97	124.81	-34	121.13		-71.37	-30.55	823.65	152.86	-118.61	168.35		-146.13	34.97	1008.77	296	-180.3	224.21
		0.12	0.12	0.04	0.06	0.1	0.14		90.59	154.78	202.25	85	72.2	56.38		81.4	189.62	483.56	91.56	129.49	88.19		72.54	200.57	168.72	106.89	280.21	85.21
		0.04	0.02	0.12	0.12				114.95	-35.9	815.69	111.13				169.18	-65.41	1088.54	139.08				217.35	-77.66	993.35	108.22
			0.03	0.08	0.1					51.42	180.65	99.76					78.28	700.42	140.54					103.79	976.36	-32.29
				0.1							589.64							1219.46							1163.95	202.48
				0.04							-33.15							-475.74							-914.86
		SIT SUP CRT	SIT SUP SRT	SIT UNSUP CRT	SIT UNSUP SRT	UP CRT	UP SRT		SIT SUP CRT	SIT SUP SRT	SIT UNSUP CRT	SIT UNSUP SRT	UP CRT	UP SRT		SIT SUP CRT	SIT SUP SRT	SIT UNSUP CRT	SIT UNSUP SRT	UP CRT	UP SRT		SIT SUP CRT	SIT SUP SRT	SIT UNSUP CRT	SIT UNSUP SRT	UP CRT	UP SRT
		0.11	0.11	0.07	0.09	0.12	0.02		87.13	-629.07	51.88	75.05	83.16	-56.46		115.56	-984.07	51.74	106.56	127.88	-12.85		-310.18	-1322.52	68.45	213.9	139.53	74.74
		0.09	0.06		0.08	0.12	0.02		410.49	1052.75		134.09	3666.8	133.85		424.32	1031.08		194.53	3825.86	199.9		866.17	1435.73		247.68	471.18	367.78
		0.1	0.08		0.01	0.07	0.11		410.09	-533.16		71.62	682.74	36.37		505.27	-583.02		108.62	735.41	151.68		483.18	338.15		111.9	-409.91	359.27
			0.1		0.13	0.1	0.12			1032.69		110.03	2570.49	1504.56			1391.51		167.16	2565.32	2105.88			1832.3		872.47	446.6	783.72
		0.09		0.03		0.14	0.12		174.32		38.74		1622.16	1191.85		323.45		74.02		1821.98	1493.43		1298.08		115.18		612.74	601.34
			0.09	0.08	0.04	0.13	0.07			314.08	-44.34	86.38	1874.76	63.77			107.92	-79.6	88.11	2743.01	33.91			1988.23	-109.91	87.17	875.48	92.01
		0.12		0.12	0.06	0.09	0.03		345.67		20.12	127.87	2116.62	129.15		559.83		3.18	160.06	3730.13	200.1		-232.63		-1.05	321.01	2084.85	233.63
		0.02	0.07	0.07	0.02	0.11	0.11		-132.57	1142.68	8.75	-16.67	671.12	7.49		-176.16	1259.87	-71.4	4.21	1257.11	11.44		463.49	1522.48	-151.08	128.39	823.19	286.72
		0.01	0.11		0.09	0.08	0.13		513.68	638.14		37.11	2525.31	100.03		384.5	688.26		74.54	3515.23	115.89		-147.17	1808.11		62.31	943.53	89.8
		0.14		0.05	0.1				630.32		-53.89	32.66				783.56		-79.41	53.59				2036.01		-108.1	145.63
		SIT SUP CRT	SIT SUP SRT	SIT UNSUP CRT	SIT UNSUP SRT	UP CRT	UP SRT		SIT SUP CRT	SIT SUP SRT	SIT UNSUP CRT	SIT UNSUP SRT	UP CRT	UP SRT		SIT SUP CRT	SIT SUP SRT	SIT UNSUP CRT	SIT UNSUP SRT	UP CRT	UP SRT		SIT SUP CRT	SIT SUP SRT	SIT UNSUP CRT	SIT UNSUP SRT	UP CRT	UP SRT
			0.08	0.14	0.13	0.12	0.04			65.18	66.92	75.39	152.01	107.45			101.97	106.04	107.49	89.16	193.98			162.17	132.26	147.56	-21.31	206.89
			0.02			0.05				101.12			4.54				106.85			36.95				117			34.27
		0.13		0.02	0.11	0.07	0.03		112.28		71.98	-31.23	682.48	77.61		178.55		95.8	4.09	1933.8	150.84		255.49		142.59	116.38	1343.45	295.54
		0.11	0.09	0.06	0.07		0.02		128.92	194.82	85.68	179.13		85.77		220.58	288.99	124.14	216.3		140.78		804.12	358.36	272.68	234.84		172.96
		0.03				0.09			33.57				3201.83			259.87				3346.17			201.09				-2432.14
		0.11	0.03	0.11	0.12		0.12		233.56	7.55	96.17	67.53		1192.1		365.59	31.37	91.73	110.45		2618.49		626.3	65.85	72.66	174.18		2141.04
		0.04	0.1	0.11		0.1	0.13		43.59	64.28	63.02		54.55	917.27		56.99	62.12	83.74		-15.22	1436.03		184.18	217.58	137.5		-42.53	906.4
		0.05			0.07	0.03	0.07		27.33			61.07	-33.66	196.24		63.39			104.07	-60.96	284.76		75.1			131.18	47.42	300.5
		0.12	0.03						137.32	-24.23						149.47	-0.34						192.07	-7.45
		0.03		0.07	0.05		0.04		135.24		42.31	86.36		86.69		85.21		114.52	93.65		111.15		59.11		244.59	101.92		66.53
		SIT SUP CRT	SIT SUP SRT	SIT UNSUP CRT	SIT UNSUP SRT	UP CRT	UP SRT		SIT SUP CRT	SIT SUP SRT	SIT UNSUP CRT	SIT UNSUP SRT	UP CRT	UP SRT		SIT SUP CRT	SIT SUP SRT	SIT UNSUP CRT	SIT UNSUP SRT	UP CRT	UP SRT		SIT SUP CRT	SIT SUP SRT	SIT UNSUP CRT	SIT UNSUP SRT	UP CRT	UP SRT
		0.12	0.12	0.03			0.11		114.23	112.7	14.76			172.22		164.57	179.92	19.07			240.54		306.55	229.01	37.62			395.18
			0.03		0.11	0.06	0.13			47.27		49.02	1108.13	173.17			111.49		103.47	1159.81	251.76			166.39		204.74	167.9	324.38
			0.13	0.02	0.13		0.04			43.54	126.54	23.33		20.22			115.84	214.81	25.55		40.8			173.11	313.3	55.01		97.71
			0.07		0.14	0.07	0.02			363.85		79.76	218.52	58.32			664.56		174.28	324.57	76.09			739.92		296.76	422.18	84.24
			0.06	0.03	0.09	0.04	0.11			2.15	177.37	110.03	244.81	19.57			39.96	227.17	114.44	188.58	96.12			191.74	256.47	1598.27	60.7	241.61
		0.11				0.07	0.11		503.24				203.96	80.24		548.88				308.04	74.31		85.8				407.3	167.45
		0.1	0.13	0.13					53.71	13.64	-30.13	62.7				119.33	-7.17	-33.95	65.11				227.75	171.26	-5.71	62.99
		0.06	0.1	0.08	0.1	0.05	0.12		96.55	695.73	154.41	63.88	50.97	34.41		114.42	710.2	198.19	88.56	6.4	43.08		18.45	187.31	268.04	157.53	43.36	198.19
			0.05		0.11	0.11	0.12			577.6		66.3	161.83	22.4			631.55		76.26	235.87	91.37			243.89		146.33	261.04	259.59
		0.07	0.11	0.06		0.06	0.02		-151.49	149.72	5.39		608.07	101.67		-220.47	142.1	7.43		1146.19	156.79		-444.77	75.06	43.84		668.51	206.75

## Sheet: SOL(2)
		SOLEO
		LAT							APA 100							APA 150							CPA
		0.07	0.04	0.13	0.12	0.07	0.09		-72.82	-27.64	-174.02	-88.08	28.03	-372.4		-148.1	92.61	-238.8	-132.38	2703.86	-744.21		-106.8	1288.22	-274.91	-112.2	7247.64	3173.87
		0.02	0.01	0.09	0.11	0.05	0.03		19.4	627.22	67.7	-82.48	1026.76	297.57		-41.76	871.9	103.69	-101.38	1886.35	2003.71		609.06	632.43	161.18	-130.37	4466.53	4132.2
		0.12	0.12	0.13	0.08	0.13	0.04		-279.73	-44.86	99.76	-128.53	-683.89	2645.97		-394.49	660.7	95.06	-218.09	158.53	5416.34		146.6	2150.07	85.65	-252.26	2817.64	6190.79
		0.05	0.12	0.1	0.12	0.01	0.09		151.25	-364.94	-43.13	-79.15	316.72	603.18		211.23	166.64	57.96	-85.58	-548.83	1785.28		1197.32	1659.9	88.01	-74	-3966.38	1964.03
		0.01	0.06	0.12	0.06	0.1	0.05		-138.4	380.46	-30.19	-86.04	1309.74	790.1		-168.95	515.62	455.99	-146.01	3333.82	2106.93		-29.76	1036.62	1917.58	-207.4	4055.15	3625.63
		0.07	0.11	0.08		0.11	0.1		90.18	-650.53	-97.02	-87.01	-407.82	-350.56		59.04	-908.26	-277.75	-149.06	-1214.48	9.13		1174.26	-46.92	1245.3	-168.67	-1641.92	524.29
		0.12	0.13	0.03		0.09			228.98	1125.21	1065.44	-91.8817	3250.77	602.31		253.05	1846.34	1610.86	-138.75	5505.63	1762.86		2126.8	2566.2	2683.17	-157.483	5655.58	3268.47
		0.03							67.86	149.274	-65.48		691.473			268.57	463.65	384.49		1689.27			357.82	1326.65	1781.79		2662.03
									8.34		102.883					4.82375		273.938					684.412		960.971
		SIT SUP CRT	SIT SUP SRT	SIT UNSUP CRT	SIT UNSUP SRT	UP CRT	UP SRT		SIT SUP CRT	SIT SUP SRT	SIT UNSUP CRT	SIT UNSUP SRT	UP CRT	UP SRT		SIT SUP CRT	SIT SUP SRT	SIT UNSUP CRT	SIT UNSUP SRT	UP CRT	UP SRT		SIT SUP CRT	SIT SUP SRT	SIT UNSUP CRT	SIT UNSUP SRT	UP CRT	UP SRT
				0.14	0.11	0.09	0.11				7.94	-120.1	119.55	-356				-1.73	-146.6	2340.03	375.84				33.42	-154.72	5898.34	1241.39
				0.08	0.08	0.13	0.08				-191.58	-100.98	271.87	438.96				-282.41	-176.22	499.46	1196.81				-293.31	-214.01	3434.79	3381.03
				0.06	0.08		0.09				-178.79	-61.62	195.71	-74.68				-233.9	-105.24	1419.75	985.31				-257.82	-289.77	4666.57	2746.03
				0.05	0.1		0.06				-76.9	-117.04		-70.65				-164.61	-170.62		539.32				-254.23	-157.09		2592.63
					0.13		0.11				-109.833	-113.99		526.82				-170.663	-148.45		2739.09				-192.985	-105.36		3686
					0.07		0.03					-2.01		727.4					-65.91		2608.43					-132.86		3326.11
					0.14		0.03					-3.02		570.34					-45.51		1699.8					-133.19		2310.85
							0.04					-74.1086		1005.29					-122.65		2263.71					-132.39		3316.18
														340.62							1390.12					-137.9		2577.69
		SIT SUP CRT	SIT SUP SRT	SIT UNSUP CRT	SIT UNSUP SRT	UP CRT	UP SRT		SIT SUP CRT	SIT SUP SRT	SIT UNSUP CRT	SIT UNSUP SRT	UP CRT	UP SRT		SIT SUP CRT	SIT SUP SRT	SIT UNSUP CRT	SIT UNSUP SRT	UP CRT	UP SRT		SIT SUP CRT	SIT SUP SRT	SIT UNSUP CRT	SIT UNSUP SRT	UP CRT	UP SRT
		0.05	0.13	0.09	0.1	0.03	0.11		-72.08	-60.37	-84.47	-43.12	1031.43	-233.26		72.44	71.4	-111.66	-70.98	4843.83	2099.33		75.69	-21.24	-88.9	-74.05	8583.28	6848.13
		0.08	0.09	0.06	0.12	0.07	0.01		-154.71	-49.9	-38.24	-90.35	1682.11	948.59		-228.79	-89.04	-76.81	-142.73	2467.63	4854.91		-295.94	22.65	-127.22	-137.58	9563.2	10596.2
		0.14	0.12	0.06	0.13	0.07	0.13		-204.18	-120.44	-45.75	-107.42	2619.85	4339.67		-312.44	-160.81	-89	-149.92	9145.18	6905.09		-279.88	-237.18	-141.79	-199.92	10739	5892.56
		0.09	0.07	0.05	0.04	0.1	0.01		-41.73	-58.67	-72.92	-40.11	4585.67	-638.14		-100.18	48.28	-90.15	-74.39	8128.85	790.91		-177.74	69.85	-150.01	-117.63	11154	270.66
		0.1	0.02	0.07	0.09	0.02	0.12		-178.86	-32.89	-56.16	-78.61	2610.57	-2350.32		-259.91	157.28	-67.62	-126.61	6055.99	-315.89		-214.83	149.49	-16.99	-144.41	6557.9	3901.2
		0.06	0.11	0.09	0.08	0.01	0.04		3.17	-29.59	-23.04	-45.91	-281.06	4713.4		78.51	294.17	-51.75	-69.17	3483.88	6916.94		3.16	214.43	-100.46	-82.38	2198.99	2331.64
		0.09	0.11	0.14	0.13		0.04		-78.88	-6.31	-75.93	-74.93	2041.43	1696.74		-36.33	108.85	-127.2	-133.05	5687.56	6041.1		114.37	60.99	-217.49	-214.28	8132.72	11341.8
				0.06	0.11		0.02		-103.896	-51.1671	-26.17	-103.42		3285.26		-112.386	61.4471	-31.96	-174.1		6044.82		-110.739	36.9986	-13.05	-274.19		4583.54
							0.04				-52.835	-72.9838		2047.69				-80.7688	-117.619		5208.76				-106.989	-155.555		4803.14
							0.11							5216.15							10866.6							10832.6
		SIT SUP CRT	SIT SUP SRT	SIT UNSUP CRT	SIT UNSUP SRT	UP CRT	UP SRT		SIT SUP CRT	SIT SUP SRT	SIT UNSUP CRT	SIT UNSUP SRT	UP CRT	UP SRT		SIT SUP CRT	SIT SUP SRT	SIT UNSUP CRT	SIT UNSUP SRT	UP CRT	UP SRT		SIT SUP CRT	SIT SUP SRT	SIT UNSUP CRT	SIT UNSUP SRT	UP CRT	UP SRT
		0.06	0.01	0.03	0.13	0.1	0.01		-65.69	-104.34	-290.33	2.32	1706.93	-219.19		1349.3	425.96	-325.01	94.43	4860.79	212.06		3673.28	2035.63	-433.32	113.89	10446.4	3233.74
		0.13	0.08	0.11	0.06	0.12	0.13		80.42	-45.84	28.92	-143.27	-242.67	-1275.6		1125.1	565.6	141.32	-146.17	1536.15	-1482.66		2894.84	2394.83	1121.82	-190.14	8854.19	1028.05
		0.12	0.02	0.09	0.11	0.08	0.02		444.05	-45.34	-9.06	65.69	-358.48	162.65		1125.83	383.16	83.02	92.86	1581.97	750.37		2206.8	4896.51	978.49	223.05	8838.5	4828.72
		0.06	0.03	0.1	0.11	0.02	0.01		156.17	-13.28	-167.38	-102.18	-236.48	154.91		905.75	579.81	-163.69	-33.57	34.3	2739.91		637.91	1191.25	750.6	-90.79	1777.45	8357.48
		0.13	0.06	0.1	0.07	0.13	0.04		176.51	86.38	10.45	-11.1	9.34	-20.71		909.43	366.74	131.79	-78.03	123.24	1350.09		1277.91	813.64	659.53	61.69	1733.59	6230.21
		0.11	0.13	0.13	0.13	0.12			419.72	19.23	-38.64	64.99	-730.04	270.86		1586.17	456.77	-5.71	86.73	674.85	720.59		3915.34	2325.93	963.59	94.96	7225.42	4077.21
		0.1	0.05		0.1				544.72	66.32	-77.6733	-19.93	24.7667	790.85		931.06	1267.2	-23.0467	-112.25	1468.55	3013.47		1067.38	2936.86	673.452	-23.08	6479.26	9594.32
		0.06	0.06						502.06	34.8		-20.4971		-19.4614		1194.32	957.9		-13.7143		1043.4		1174.95	1152.49		27.0829		5335.68
			0.05						282.245	-6.49						1140.87	678.19						2106.05	1766.93
		SIT SUP CRT	SIT SUP SRT	SIT UNSUP CRT	SIT UNSUP SRT	UP CRT	UP SRT		SIT SUP CRT	SIT SUP SRT	SIT UNSUP CRT	SIT UNSUP SRT	UP CRT	UP SRT		SIT SUP CRT	SIT SUP SRT	SIT UNSUP CRT	SIT UNSUP SRT	UP CRT	UP SRT		SIT SUP CRT	SIT SUP SRT	SIT UNSUP CRT	SIT UNSUP SRT	UP CRT	UP SRT
		0.01	0.1	0.13	0.13	0.05	0.03		-60.6	-93.91	-111.81	17.39	-254.12	-138.56		-84.4	-119.43	-181.7	-39.64	164.92	695.1		828.16	-69.81	-199.59	-91.53	2621.11	7135.51
		0.05	0.12	0.03	0.14	0.11	0.12		-36.11	-27.32	-83.36	11.89	-645.55	-2381.82		-48.59	-26.44	-149.84	-12.68	-219.32	-787.74		1685.91	148.31	-297.4	-49.54	2700.41	6648.71
		0.14	0.04	0.13	0.14	0.08	0.14		-91.21	-160.31	-50.29	-206.19	-449.835	-901.38		-146.34	-181.23	-100.47	-313.32	-27.2	-261.98		833.32	96.46	-182.97	-406.63	2660.76	2229.28
		0.12	0.07	0.05	0.13		0.09		-31.77	-68.44	-48.02	23.73		430.4		-105.79	-39.25	-83.38	-2.56		4025.21		863.62	538.55	-117.16	-43.48		6514.61
		0.08	0.04	0.09	0.1		0.01		-123.99	-24.65	-133.16	-103.07		-858		-168.49	326.07	-188.81	-108.76		901.29		851.06	519.39	-177.45	-149.03		4808.47
		0.13	0.13	0.03	0.02		0.078		-11.43	-38.91	-19.34	-103.64		-769.872		392.06	-52.8	-68.73	-151.36		914.376		2391.39	8.02	-94.42	-221.89		5467.32
		0.1			0.09				-85.66	-68.9233	-74.33	-143.16				-176.26	-15.5133	-128.822	-186.92				463.05	206.82	-178.165	-243.62
									-62.9671			-71.8643				-48.2586			-116.463				1130.93			-172.246
		SIT SUP CRT	SIT SUP SRT	SIT UNSUP CRT	SIT UNSUP SRT	UP CRT	UP SRT		SIT SUP CRT	SIT SUP SRT	SIT UNSUP CRT	SIT UNSUP SRT	UP CRT	UP SRT		SIT SUP CRT	SIT SUP SRT	SIT UNSUP CRT	SIT UNSUP SRT	UP CRT	UP SRT		SIT SUP CRT	SIT SUP SRT	SIT UNSUP CRT	SIT UNSUP SRT	UP CRT	UP SRT
		0.12	0.01	0.1	0.11	0.11	0.13		-180.99	-112.39	-41.57	-120.03	396.4	137.21		-313.92	-242.55	-67.95	-222.36	987.2	1032.5		-264.1	-204.43	-92.78	-212.51	1158.53	2094.92
		0.11	0.12	0.13	0.06	0.02	0.09		41.03	-45.56	-101.55	-77.24	349.02	322.51		59.11	-84.22	-130.16	-109.9	787.82	506.27		207.1	25.03	-203.25	-124.17	2546	757.44
		0.1	0.04	0.11	0.13	0.06	0.13		-23.9	-146.78	-21.14	-73.21	98.55	428.51		-62.33	-263.54	-33.29	-148.63	302.52	1305.34		204.34	-185.93	-98.92	-154.22	2006.14	1387.18
		0.1	0.13		0.1	0.13	0.06		-125.04	28.98	-54.7533	-46.93	604.06	472.98		-149.2	-72.09	-77.1333	-71.55	1840.1	828.82		-70.44	66.89	-131.65	-67.6	2447.25	1171.44
		0.11	0.075		0.11	0.04	0.01		-39.26	-68.9375		-82.77	22.02	17.53		-120.66	-165.6		-111.49	343.31	500.18		46.75	-74.61		-167.96	1585.58	1590.6
		0.14			0.13	0.01	0.12		-75.28			-111.03	536.49	88.42		-119.73			-149.56	815.61	503.77		-95.84			-259.46	1314.8	1796.53
		0.02							26.41			-85.2017	334.423	246.4		-11.61			-135.582	846.093	162.73		169.03			-164.32	1843.05	335.8
		0.03							-86.2					244.794		-85.26					691.373		67.83					1304.84
									-57.9038							-100.45							33.0837
		SIT SUP CRT	SIT SUP SRT	SIT UNSUP CRT	SIT UNSUP SRT	UP CRT	UP SRT		SIT SUP CRT	SIT SUP SRT	SIT UNSUP CRT	SIT UNSUP SRT	UP CRT	UP SRT		SIT SUP CRT	SIT SUP SRT	SIT UNSUP CRT	SIT UNSUP SRT	UP CRT	UP SRT		SIT SUP CRT	SIT SUP SRT	SIT UNSUP CRT	SIT UNSUP SRT	UP CRT	UP SRT
		0.08	0.11	0.13	0.11	0.11	0.05		-138.26		-70.8	-10.61	2128.72			-283.89		-100.26	-64.64	2572.37			-412.82		-80.12	-95.28	4344.09
		0.11	0.09	0.11	0.09	0.03	0.12		-74.52			-9.18				-56.97			-9.62				-120.34			-102.5
		0.11	0.05	0.1	0.07	0.04			25.37	-70.39	-128.74	-213.82	444.18			0.55	-129.92	-166.72	-271.16	444.82			12.5	-148.74	-204.52	-485.21	1159.38
		0.14	0.12	0.12	0.07	0.11				-160.69	-90.49	-256.47	-46.78				-293.89	-141.98	-431.54	-155.71				-317.52	-131.49	-539.04	2033.34
		0.05		0.01	0.13				-22.96		-22.1	83.83				-6.9		-84.39	88.53				-104.33		-97.97	57.58
		0.12		0.1	0.12
				0.03					-117.02		-74.58					-190.61		-111.14					-256.6		-130.61
				0.07					-102.23	55.9	-187.68		-536.61			-129.05	23.73	-258.41		53.12			-115.27	127.44	-407.78		479.61
									-27.56	-67.36	-25.67	-1.28		2824.77		-94.49	-149.18	-71.28	36.08		3492.49		-95.67	-124.43	-117.86	-27.11		4513.7
											-174.15			-295.74				-262.79			51.28				-365.52			2020.7
		SIT SUP CRT	SIT SUP SRT	SIT UNSUP CRT	SIT UNSUP SRT	UP CRT	UP SRT		SIT SUP CRT	SIT SUP SRT	SIT UNSUP CRT	SIT UNSUP SRT	UP CRT	UP SRT		SIT SUP CRT	SIT SUP SRT	SIT UNSUP CRT	SIT UNSUP SRT	UP CRT	UP SRT		SIT SUP CRT	SIT SUP SRT	SIT UNSUP CRT	SIT UNSUP SRT	UP CRT	UP SRT
		0.1	0.1		0.13	0.13			-176.41	-163.45		-81.34	354.58			-269.38	-245.52		-60.39	723.26			-357.18	-319.07		-116.17	3788.62
		0.05	0.02	0.12		0.09			-139.99	-155.09	-74.56		-54.61			-188.46	-228.81	-128.31		-25.16			-265.19	-215.27	-182.75		1943.5
		0.08	0.13		0.05		0.13		-101.31	-113.67		-97.24		18.88		-141.4	-184.21		-172.71		86.96		-199.08	-144.66		-270.66		2459.9
		0.12	0.02	0.13	0.03	0.13	0.11		58.93	-114.21	9.61	-40	21.34	102.73		64.77	-198.27	15.64	-75.97	958.14	204.32		68.94	-284.53	47.7	-109.53	2096.17	1904.61
		0.14		0.05					-114.78		-8.34					-151.99		-20.09					-146.82		-121.98
			0.09	0.13	0.09		0.11			-9.59	-89.75	-138.39		-52.66			5.85	-91.33	-260.19		106.63			47	-165.92	-357.66		3153.54
		0.05		0.11					-107.21		-30.94					-170.58		-110.14					-219.43		-99.98
		0.06	0.05	0.08	0.13		0.07		-97.17	-107.45	-78.5	-81.92		220.7		-112.38	-119.78	-88.43	-83.14		1039.57		-142.32	-190.24	-143.42	-175.52		4630.64
		0.02	0.14	0.12		0.01			-19.54	-50.03	-1.82		-136.29			-83.65	-68.6	-28.38		-207.52			-109.89	-126.87	-16.1		752.35
		0.02	0.11	0.03	0.13				-197.77	-63.42	-69.15	-90.11				-238.41	-131.4	-128.17	-105.8				-257.57	-218.41	-171.17	-121.65
		SIT SUP CRT	SIT SUP SRT	SIT UNSUP CRT	SIT UNSUP SRT	UP CRT	UP SRT		SIT SUP CRT	SIT SUP SRT	SIT UNSUP CRT	SIT UNSUP SRT	UP CRT	UP SRT		SIT SUP CRT	SIT SUP SRT	SIT UNSUP CRT	SIT UNSUP SRT	UP CRT	UP SRT		SIT SUP CRT	SIT SUP SRT	SIT UNSUP CRT	SIT UNSUP SRT	UP CRT	UP SRT
			0.08	0.05	0.1					-113.03	27.28	-84.23					-147.9	14.67	-89.82					230.46	76.71	-115.67
			0.01							16.34							70.72							156.02
					0.05		0.01					-99.11		13.04					-166.17		193.89					-19.15		1126.41
				0.08	0.08						-9.44	-99.61						-30.7	-129.15						-18.28	-223.54
		0.01	0.1		0.09	0.11			-74.05	-55.85		-91.47	-14.92			-105.54	-141.06		-144.75	-17.63			14.03	-220.94		-179.2	831.07
				0.13							89.32							8.03							-328.56
			0.1	0.13	0.08					-10.66	25.89	-74.62					-25.31	15.87	-136.24					-31.99	-183.08	-165.9
					0.02							-94.21							-162.13							-200.64
		0.04		0.1	0.13	0.13	0.04		-14.68		-104.16	-230.84	125.61	48.57		-63.19		-160.21	-292.84	197.03	444.29		-36.28		-262.74	-280.83	-146.4	833.29
				0.14	0.06	0.1					9.18	-94.34	-4.13					-42.05	-132	-30.91					-143.32	-192.87	1108.71
		SIT SUP CRT	SIT SUP SRT	SIT UNSUP CRT	SIT UNSUP SRT	UP CRT	UP SRT		SIT SUP CRT	SIT SUP SRT	SIT UNSUP CRT	SIT UNSUP SRT	UP CRT	UP SRT		SIT SUP CRT	SIT SUP SRT	SIT UNSUP CRT	SIT UNSUP SRT	UP CRT	UP SRT		SIT SUP CRT	SIT SUP SRT	SIT UNSUP CRT	SIT UNSUP SRT	UP CRT	UP SRT
		0.07	0.14				0.09		378.15	-76.19				-12.75		712.24	-132.49				1296.17		399.24	939.24				5527.53
			0.11	0.09	0.11		0.14			-70.1	-96.92	-110		-325.25			-92.69	-113.42	-155.64		379.34			994.14	-126.14	-176.11		5151.03
			0.07	0.13	0.06					-124.45	-67.42	-151.14					-177.59	-78.37	-224.79					602.56	-97.89	-219.71
					0.1		0.04					-175.87		1809.74					-278.95		2578.48					-389.51		7549.42
			0.13	0.12	0.12					-74.15	-17.97	242.96					-76.94	-30.43	811.9					866.72	-63.34	5233.28
		0.11			0.04				10.77			543.36				640.91			502.19				2208.2			374.95
			0.1		0.1					-0.34		-111.46					-15.41		-167.64					562.73		-229.52
			0.1	0.14	0.1	0.12	0.13			-55.51	-52.64	-61.77	-119.33	-1272.92			-37.54	-54.12	-85.7	854.61	-190.96			870.78	-1.43	38.19	3113.56	1996.05
					0.05		0.12					-127.77		846.95					-205.74		900.23					-250.33		4905.37
				0.11	0.13		0.11				-65.03	-28.43		-571.5				-100.83	-74.56		-554.79				-178.41	-77.22		4769.37

## Sheet: GAS (2)
		GAS subj1
		LAT							APA 100							APA 150							CPA
		SIT SUP CRT	SIT SUP SRT	SIT UNSUP CRT	SIT UNSUP SRT	UP CRT	UP SRT		SIT SUP CRT	SIT SUP SRT	SIT UNSUP CRT	SIT UNSUP SRT	UP CRT	UP SRT		SIT SUP CRT	SIT SUP SRT	SIT UNSUP CRT	SIT UNSUP SRT	UP CRT	UP SRT		SIT SUP CRT	SIT SUP SRT	SIT UNSUP CRT	SIT UNSUP SRT	UP CRT	UP SRT
		0.1	0.05	0.1	0.09	0.02	0.1		108.83	78.91	-3.46	83.92	282.57	427.35		162.13	116.6	1.31	133.94	-248.05	715.79		218.86	251.55	-59.57	107.68	686.16	2704.57
		0.09	0.01	0.09	0.14	0.04	0.07		-8.03	64.87	168.35	40.53	-1701.16	851.64		-22.54	137.83	216.74	73.43	-1400.52	1763.44		50.43	221.62	256.39	102.29	-1342.1	3078.68
		0.08	0.14	0.04	0.12	0.05	0.03		67.2	141.21	99.14	76.8	-1575.27	626.34		76.52	272.73	154.2	126.09	-644.08	2192.77		120.19	429.75	238.41	187.07	3019.1	5676.21
		0.1	0.11	0.1	0.1	0.08	0.1		62.32	83.07	60.7	20.22	494.66	1706.19		109.93	186.51	77.96	19.99	1867.42	2701.76		159.68	336.94	155.67	37.57	4306.23	6069.3
		0.11	0.06	0.12	0.11		0.02		215.99	104.42	-71.42	83.99		184.51		324.05	244.98	-32.37	129.08		124.97		468.94	764.12	49.61	175.97	1667.35	11.21
		0.11	0.04	0.14	0.05				99.1	106.56	105.15	18.33		-471.37		156.25	101.02	181.54	52.83		-446.29		523.63	66.23	414.04	87.23		-1182.58
		0.11	0.14	0.11	0.05				-52.45	193.47	279.81	21				-66.48	376.75	567.07	18.05				-9.23	635.27	973.1	-30.16		2726.23
				0.11	0.1						628.75	88.17						965.92	131.22				218.929	386.497	986.58	168.02
				0.09	0.08						227.93	71.94						495.23	64.46						2113.52	-2.79
		LATENCIA
		SIT SUP CRT	SIT SUP SRT	SIT UNSUP CRT	SIT UNSUP SRT	UP CRT	UP SRT		SIT SUP CRT	SIT SUP SRT	SIT UNSUP CRT	SIT UNSUP SRT	UP CRT	UP SRT		SIT SUP CRT	SIT SUP SRT	SIT UNSUP CRT	SIT UNSUP SRT	UP CRT	UP SRT		SIT SUP CRT	SIT SUP SRT	SIT UNSUP CRT	SIT UNSUP SRT	UP CRT	UP SRT
			0.01	0.09	0.03	0.03	0.03			378.59	-101.1	649.31	543.65	10.96			800.8	-126.76	1322.34	1475.03	1505.75			831.19	-102.5	5585.75	4804.48	4516.8
			0.06	0.13	0.13	0.1	0.01			298.11	117.14	550.19	-79.67	25.1			680.27	197.51	1116.67	248.29	793.16			1272.15	308.74	3675.3	3569.26	1997.26
			0.06	0.12	0.12	0.01	0.02			471.33	30.45	1964.4	191.07	-0.79			1025.74	52.7	2982.43	412.27	1271.35			1861.5	53.54	7330.64	3685.36	2918.64
			0.04	0.13	0.08	0.11	0.04			365	24.04	755.5	333.49	259.55			674.55	66.07	1271.13	664.97	1401.14			923.7	115.94	3019.61	3655.12	2630.82
			0.11	0.04	0.11		0.04			-279.79	-1.61	2338.46		372.34			72.05	12.14	3489.36		863.74			9.98	8.49	6431.73	3928.56	1915.79
			0.05		0.08		0.05			-95.29		1014.67		-123.85			207.26		2032.06		1071.65			666.62	76.842	5590.57		2149.87
					0.08		0.04					1630.91		401.58					3905.98		1331.45			927.523		5347.3		2513.39
					0.02		0.07					-61.77		105.93					23.92		1423.82					1497.94		2439.2
					0.1							1496.33							2723.08		1207.76					8118.85		2635.22
		SIT SUP CRT	SIT SUP SRT	SIT UNSUP CRT	SIT UNSUP SRT	UP CRT	UP SRT		SIT SUP CRT	SIT SUP SRT	SIT UNSUP CRT	SIT UNSUP SRT	UP CRT	UP SRT		SIT SUP CRT	SIT SUP SRT	SIT UNSUP CRT	SIT UNSUP SRT	UP CRT	UP SRT		SIT SUP CRT	SIT SUP SRT	SIT UNSUP CRT	SIT UNSUP SRT	UP CRT	UP SRT
		0.08	0.12	0.13	0.12	0.03	0.01		38.45	39.62	103.89	63.59	434.5	166.67		55.49	45.35	197.91	107.11	1231.62	1071.82		65.38	85.8	265.52	166.06	3546.55	3151.38
		0.11	0.12	0.12	0.13	0.09	0.02		483.21	44.1	-2.6	77.41	157.11	394.34		754.85	52.38	3.12	108.75	1252.69	1318.1		452.82	74.08	-5.69	145.5	1611.83	4811.88
		0.01	0.12	0.12	0.03	0.08	0.12		100.34	73.61	108.95	-4.02	573.65	1126.12		-133.69	94.28	150.3	19.48	1726.76	2194.43		-1024.46	164.92	185.81	-0.67	3268.08	1709.41
		0.08	0.13	0.1	0.08	0.06			88.36	83.49	7.7	34.34	368	145.39		186.72	198.49	6.57	60.84	559.52	902.1		267.57	235.02	31.21	85.65	4111.64	881.24
		0.1	0.13	0.01	0.03		0.13		169.49	28.89	124.74	81.43	49.71	269.61		221.12	481.72	169.9	102.36	669.91	520.17		261.64	544.27	182.04	114.78	1660.45	556.15
			0.02	0.14	0.12	0.06	0.06			135.55	-75.93	90.82	61.81	494.22			179.18	-127.2	110.07	596.36	1431.03		4.59	226.27	-217.49	120.15	1073.95	652.83
			0.03	0.06	0.08	0.02	0.04			95.59	-26.17	41.11	144.01	306.14			634.14	-31.96	78.86	1800.16	1015.13			636.18	-13.05	68.69	2559.09	4756.4
			0.13		0.13	0.03	0.02			90.46		22.17	877.14	544.97			572.81		15.12	2100.89	3391.37			514.42	61.1929	-63.19	2241.69	4134.79
			0.1		0.09		0.1			289.01		101.86		399.71			589.95		477.04		1066.22			433.62		511.31	2509.16	949.55
							0.05
		SIT SUP CRT	SIT SUP SRT	SIT UNSUP CRT	SIT UNSUP SRT	UP CRT	UP SRT		SIT SUP CRT	SIT SUP SRT	SIT UNSUP CRT	SIT UNSUP SRT	UP CRT	UP SRT		SIT SUP CRT	SIT SUP SRT	SIT UNSUP CRT	SIT UNSUP SRT	UP CRT	UP SRT		SIT SUP CRT	SIT SUP SRT	SIT UNSUP CRT	SIT UNSUP SRT	UP CRT	UP SRT
		0.03	0.05	0.02	0.13	0.09	0.03		110.36	48.78	1160.55	112.51	1260.86	539.28		939.75	244.12	2043.09	202.41	2148.81	1096.58		1459.32	964.5	8294.98	162.71	6031.32	2834.02
		0.13	0.11	0.13	0.06	0.02	0.04		201.91	-1.62	338.38	62.69	323.89	693.73		701.02	367.11	1004.42	106.09	462.57	929.04		713.72	885.56	2186.21	371.7	5200.53	2626.11
		0.1	0.08	0.12	0.09	0.02	0.13		184.79	6.64	610	99.56	52.67	-217.33		550.86	338.93	1668.1	156.59	727.35	457.71		914.66	907.1	4072.45	227.73	2931.56	2817.64
		0.07	0.08		0.13	0.01	0.11		11.61	80.54		209.87	173.86	380.23		159.89	217.69		405.26	1038.03	834.12		45.51	433.42	4851.21	658.3	3069.14	1727.47
		0.08	0.01		0.08	0.13	0.11		-22.12	1.27		70.78	-117.82	327.82		35.23	163.36		126.9	535.17	762.48		175.29	474.63		900.47	3398.55	2832.9
		0.09	0.05		0.05	0.1	0.07		58.41	26.01		157.86	1405.66	833.24		320.78	221.36		252.31	1915.71	2082.83		422.71	517.9		807.85	2271.24	5353.43
		0.06	0.03		0.09	0.01			297.98	59.59		189.46				711.33	164.28		280.94	1159.48			1078.79	491.6		287.13	6499.76	3031.93
		0.09	0.13						224.93	102.16						488.64	428.91						835.63	655.92		487.984	4200.3
		0.09	0.07						317.63	115.82						686.88	429.04						831.76	556.65
		SIT SUP CRT	SIT SUP SRT	SIT UNSUP CRT	SIT UNSUP SRT	UP CRT	UP SRT		SIT SUP CRT	SIT SUP SRT	SIT UNSUP CRT	SIT UNSUP SRT	UP CRT	UP SRT		SIT SUP CRT	SIT SUP SRT	SIT UNSUP CRT	SIT UNSUP SRT	UP CRT	UP SRT		SIT SUP CRT	SIT SUP SRT	SIT UNSUP CRT	SIT UNSUP SRT	UP CRT	UP SRT
		0.06	0.07	0.11	0.04	0.1	0.13		157.87	95.32	25.28	77.1	322.81	1091.81		198.39	222.55	85.52	49.01	836.93	3491.93		321.98	350.13	121.32	28.77	3516.27	12080.9
		0.12	0.11	0.09	0.01	0.11	0.05		161.95	85.55	46.26	129.58	527.09	780.78		293.67	131.61	94.94	168.24	1214.08	576.76		578.5	242.55	64.5	176.86	5137.52	2267.67
		0.13	0.13	0.07	0.06	0.05	0.03		157.15	96.9	-6.41	41.34	-215.57	382.18		175.29	160.93	-6.4	34.47	440.42	1264.15		558.36	235.85	12.43	16.92	1861.95	2513.61
		0.14	0.12	0.12	0.13		0.12		110.53	200.92	78.24	78.66		1421.84		188.8	231.38	120.61	94.2		3235.61		456.39	702.13	116.28	98.91		3082.91
		0.11	0.14	0.12	0.13				146.6	106.86	81.91	106.62				136.6	124.38	108.05	93.68				56.81	60.85	143.39	126.64
		0.1	0.05		0.11				-22.32	79.24		60.71				-26.43	135.62		97.2				231.12	130.17		136.93
		0.14	0.12						70.63	98.27						139.06	215.19						583.64	307.79
		0.12	0.07						157.56	115.77						157.9	165.46						359.41	277.11
		0.14	0.1						39.51	339.81						118.75	457.53						238.08	188.56
			0.12
		0.11	0.13	0.09	0.13	0.05	0.03																14.41	206.11	836.84	1813.39	384.6	227.05
		0.13	0.09	0.13	0.12	0.09	0.13		41.31	53.14	-119.5	123.09	832.67	190.2		75.32	102.49	-115.98	159.36	1264.91	539.19		180.01	292.49	-150.54	210.2	1935.14	989.71
		0.11	0.13	0.1	0.08	0.06	0.03		104.35	122.9	57.02	17.36	738.24	685.82		202.82	201.6	76.57	57.08	909.6	1390.53		358.59	395.28	47.81	86.71	1109.41	1757.42
		0.06	0.01	0.09	0.09	0.01	0.01		-58.29	88.36	229.4	77.39	865.21	457.73		-98.18	203.32	344.34	113.37	1302.11	1016.95		-74.34	283.92	462.47	147.78	1186.81	1693.93
		0.03	0.13	0.06		0.11	0.1		-34.43	39.13	81.39	-19.98	386	41.14		-65.55	79.94	144.27	-27.19	894.62	81.98		-23.15	195.51	155.16	37.15	782.34	304
		0.09	0.07	0.1		0.11	0.02		180.02	102.3	93.34		413.29	394.39		331.91	232.78	159.66		1151.75	1601.67		439.95	257.43	181.65		1949.98	2590.77
				0.11		0.03	0.13		22.48	45.01	49.74		573.1	194.19		44.14	55.28	41.58		1185.85	545.09		-10.16	75.9	151.05		1942.17	1007.31
							0.01			-11.41	-5.84		594.52	1025.66			32	-10.96		1021.04	1430.56			118.19	58.91		949.61	1466.42
							0.01							361.51							1296.9							1607.53
														343.3							801.06							1197.21
		SIT SUP CRT	SIT SUP SRT	SIT UNSUP CRT	SIT UNSUP SRT	UP CRT	UP SRT		SIT SUP CRT	SIT SUP SRT	SIT UNSUP CRT	SIT UNSUP SRT	UP CRT	UP SRT		SIT SUP CRT	SIT SUP SRT	SIT UNSUP CRT	SIT UNSUP SRT	UP CRT	UP SRT		SIT SUP CRT	SIT SUP SRT	SIT UNSUP CRT	SIT UNSUP SRT	UP CRT	UP SRT
		0.08	0.11	0.08	0.11	0.13	0.02		25.41	10	93.98	99.05	279.02	163.96		58.89	-5.97	115.04	124.93	484.71	385.56		122.98	42.11	120.11	141.93	1597.23	620.34
		0.04	0.03	0.11	0.07	0.03	0.05		146.67	64.22	77.96	133.25	248.83	87.44		204.12	90.09	105.85	249.97	292.75	382.57		200.57	69.89	164.2	280.15	485.91	752.76
		0.08	0.13		0.09	0.08	0.13		-21.19	90.73		122.97	-8.26	403.11		-32.61	120.14		171.8	18.56	531.35		-57.46	129.25		146.33	-145.88	798.93
		0.09	0.11		0.12	0.06	0.13		80.78	-8		13.91	-38.81	-255.94		129.26	-7.47		47.39	11.93	-399.09		133.77	-37.5		32.73	369.93	-494.14
			0.03		0.03		0.04			-47.96		75.71		291.1			-57.42		45.85		377.56			-21.05		-5.49		225.91
							0.01							265.46							470.88							717.39
		SIT SUP CRT	SIT SUP SRT	SIT UNSUP CRT	SIT UNSUP SRT	UP CRT	UP SRT		SIT SUP CRT	SIT SUP SRT	SIT UNSUP CRT	SIT UNSUP SRT	UP CRT	UP SRT		SIT SUP CRT	SIT SUP SRT	SIT UNSUP CRT	SIT UNSUP SRT	UP CRT	UP SRT		SIT SUP CRT	SIT SUP SRT	SIT UNSUP CRT	SIT UNSUP SRT	UP CRT	UP SRT
		0.03	0.13	0.11	0.11	0.09	0.03		7.17	74.48	52.64		171.94			23.93	86.9	74.89		463.18			62.74	37.81	135.48		2584.67
		0.11	0.1	0.05	0.01	0.11	0.09		23.81	98.18	90.88		335.34			20.45	155.89	146.8		376.61			34.02	227.06	160.97		2507.81
		0.11	0.02	0.09	0.1	0.12	0.08		-8.25	33.04		42.04	104.2			12.04	79.99		19.48	293.54			97.41	111.41		-29.42	4144.87
		0.02	0.07	0.06	0.09	0.14	0.1		39.31	-8.84	77.59	25.21	53.3	27.31		89.92	-31.88	122.02	263.6	283.36	10.16		116.5	-66.04	192.94	563.52	2711.51	441.03
		0.05	0.13	0.1	0.05	0.01				94.12	42.83	149.72	87.13	123.7			143.54	41.78	439.62	104.64	220.82			181.15	68.84	703.61	1439.32	819.41
		0.11	0.06	0.11	0.1	0.04				90.77	-19.82		408.71	88.21			122.76	-22.45		486.62	165.22			153.47	-42.51		4045.96	923.36
		0.12	0.12	0.14		0.11			25.81	13.14	98.91		164.67	133.31		45.4	40.63	789.88		230.25	229.65		63.83	66.44	1209.93		976.6	1364.78
		0.13	0.01	0.1		0.04			3.66	2.73	29.23	46.11		93.78		-8.64	-9.99	60.76	37.1		191.94		-5.53	-54.54	29.54	188.57		1721.24
			0.12	0.11					106.71	105.98	107.05	36.25	68.25			126.21	123.45	214.47	19.98	99.95			256.32	121.99	264.43	100.73	1772.07
			0.08						-18.95	127.04	74.48	239.76				-14.02	142.43	111.16	281.38				-40.7	90.63	233.64	445.68
		SIT SUP CRT	SIT SUP SRT	SIT UNSUP CRT	SIT UNSUP SRT	UP CRT	UP SRT		SIT SUP CRT	SIT SUP SRT	SIT UNSUP CRT	SIT UNSUP SRT	UP CRT	UP SRT		SIT SUP CRT	SIT SUP SRT	SIT UNSUP CRT	SIT UNSUP SRT	UP CRT	UP SRT		SIT SUP CRT	SIT SUP SRT	SIT UNSUP CRT	SIT UNSUP SRT	UP CRT	UP SRT
		0.13			0.06	0.04			65.21			166.6	0.04			94.63			273.77	-10.17			138.63			296.17	73.59
		0.08	0.03			0.13			97.8	303.73			0.13			91.09	733.58			176.24			170.01	3728.04			540.14
		0.03	0.11	0.11	0.01		0.04		240.63	108.8	70.84	107.81		215.85		364.82	217.12	93.63	162.44		257.8		410.68	603.67	151.62	177.04		622.93
		0.11				0.08			98.7				0.08			155.36				160.18			317.15				663.76
		0.12				0.09	0.02		-62.77				0.09	-24.3		-94.39				248.37	22.79		-44.23				1149.54	323.24
		0.04	0.09				0.1		102.72	-71.27				107.64		129.6	68.02				175.01		119.46	1629.73				361.72
		0.07		0.11	0.14	0.08	0.05		93.5		147.55	31.48	0.08	321.38		140.25		218.12	61.65	165.95	342.64		157.17		330.49	112.74	596.19	286.78
		0.04	0.12			0.01			-15.84	112.32			0.01			-33.88	178.02			97.45			-51.06	1051.74			742.61
			0.11				0.14			122.22				95.02			155.57				157.82			59.94				143.56
		0.11	0.04	0.05		0.09			9.03	76.68	73.25		0.09			24.04	162.54	117.63		84.05			109.93	143.98	190.07		351.8
		SIT SUP CRT	SIT SUP SRT	SIT UNSUP CRT	SIT UNSUP SRT	UP CRT	UP SRT		SIT SUP CRT	SIT SUP SRT	SIT UNSUP CRT	SIT UNSUP SRT	UP CRT	UP SRT		SIT SUP CRT	SIT SUP SRT	SIT UNSUP CRT	SIT UNSUP SRT	UP CRT	UP SRT		SIT SUP CRT	SIT SUP SRT	SIT UNSUP CRT	SIT UNSUP SRT	UP CRT	UP SRT
		0.01	0.11		0.08				74.55	77.96		-420.96				54.31	100.65		-613.35				196.58	243.46		-939.49
				0.09	0.11	0.05					325.99	145.98	67.98	42.56				346.09	144.36	174.6	595.89				537.5	-524.81	1992.68	2198.05
		0.1	0.05	0.1	0.11				127.88	98.99	97.95	-187.03				130.95	385.99	167.85	-542.94				-37.31	593.47	253.07	-972.11
													48.78	418.65						250.78	1252.83						2147.82	6183.52
		0.11		0.03	0.04	0.09			-1042.2		349.06	-373.83	88.99			-1434.04		383.42	-919.99	103.68			-1451.24		701.52	1803.2	3774.34
					0.04							59.52							437.69							248.4
			0.05		0.1					92.01		210.13					-8.51		603.35					278.9		1212.7
		0.11				0.13	0.12		375.17				989.63	444.8		548.92				2248.52	1761.52		945.46				3774.66	6025.19
			0.01				0.14			96.2				82.62			-5.27				823.54			-136.52				4371.46
		0.12		0.01	0.11	0.06	0.13		-228.11		28.55	67.15	127.12	-442.95		-604.78		143.73	90.36	306.19	-156.66		-1464.82		399.97	350.11	3458.54	5243.4

## Sheet: RF (2)
		RF subj1
		LAT							APA 100							APA 150							CPA
		SIT SUP CRT	SIT SUP SRT	SIT UNSUP CRT	SIT UNSUP SRT	UP CRT	UP SRT		SIT SUP CRT	SIT SUP SRT	SIT UNSUP CRT	SIT UNSUP SRT	UP CRT	UP SRT		SIT SUP CRT	SIT SUP SRT	SIT UNSUP CRT	SIT UNSUP SRT	UP CRT	UP SRT		SIT SUP CRT	SIT SUP SRT	SIT UNSUP CRT	SIT UNSUP SRT	UP CRT	UP SRT
		0.11	0.07	0.02	0.07	0.1	0.07		-40.94	-241.34	9.86	31.15	165.49	63.87		-34.31	436.01	42.24	32.95	193.45	57.21		8.06	2553.81	320.71	96.74	100.94	-32.87
		0.13	0.11	0.08	0.11	0.07	0.11		40.63	-118.79	-70.55	18.11	12.57	40.38		55.82	-1345.34	-1405.71	18.98	14.59	62.71		59.2	1437.32	608.59	82.09	-9.67	40.48
			0.12	0.12	0.07	0.01	0.06			-40.18	-27.82	33.21	-15.63	33.94			-705.27	-748.11	3.1	-20.09	7.53			2701.43	1750.84	-10.33	-43.19	-57.11
			0.04	0.11	0.01	0.13	0.11			-341.34	-84.03	21.32	10.42	77.56			-5356.99	-904.61	22.77	36.91	87.33			-1029.22	672.47	2.06	65.92	23.5
			0.02	0.06	0.1	0.04	0.03			35.22	20.95	-36.24	60.89	45.41			70.99	1230.93	-51.58	112.4	35.06			4191.91	4440.48	15.45	101.35	-28.05
			0.01		0.07	0.08	0.1			-93.27		27.56	13.4	44.15			-1162.54		44.66	36.57	60.85			2960.83		65.15	36.89	10.64
					0.07	0.05	0.12					-12.19	26.86	81.45					-0.16	22.47	107.48					268.53	-1.76	94.8
					0.09	0.07	0.1					-42.16	-7.5	22.23					-40.36	-13.63	-3.17					93.28	-66.1	-55.24
						0.09	0.11						25.68	26.15						7.5	26.02						-36.33	-31.53
		SIT SUP CRT	SIT SUP SRT	SIT UNSUP CRT	SIT UNSUP SRT	UP CRT	UP SRT		SIT SUP CRT	SIT SUP SRT	SIT UNSUP CRT	SIT UNSUP SRT	UP CRT	UP SRT		SIT SUP CRT	SIT SUP SRT	SIT UNSUP CRT	SIT UNSUP SRT	UP CRT	UP SRT		SIT SUP CRT	SIT SUP SRT	SIT UNSUP CRT	SIT UNSUP SRT	UP CRT	UP SRT
		0.12	0.12	0.13	0.1	0.05	0.01		-10.06	86.93	-238.9	-173.08	109.75	391.51		93.78	-95.02	-301.36	-205.33	97.38	427.68		476.88	-371.03	2458.22	1190.51	27.17	1090.59
		0.09	0.02	0.12	0.12	0.11	0.07		48.93	-222.34	-11.35	-99.34	105.16	574.27		725.94	-44.85	79.61	291.73	151.32	853.17		2896.63	593.4	1188.5	1762.35	161.52	6775.76
		0.02	0.14	0.1	0.01	0.1	0.01		-54.62	569.39	-626.18	83.67	117.27	1967.73		-39.54	1366.82	-624.24	399.23	130.24	2291.88		2493.17	1627.96	-21.28	1047.09	213.43	5810.58
		0.04	0.1	0.12	0.01	0.13	0.03		185.82	445.91	-50.03	205.24	126.54	1142.29		613.03	1321.12	-36.04	575.76	146.52	2390.14		1819.69	1321.75	887.97	1187.49	221.39	5128.91
		0.06	0.1		0.05	0.09	0.09		42.86	218.01		190.01	176.96	1509		382.84	114.4	-220.507	245.22	271.94	2941.47		1852.79	2322.76	1128.35	357.72	254.03	5532.43
		0.11	0.04			0.1	0.02		-524.82	496.15			76.69	1293.74		-398.93	771.55		261.322	75.3	3019.36		1167.48	1660.79		1109.03	58.04	5336.84
		0.08	0.06			0.12	0.07		488.3	136.28			85.24	1468.13		1322.83	435.61			895.81	2573.92		2598.24	1092.75			961.22	5703.53
			0.11			0.08	0.11			-51.3			104.28	2140.82			144.14			122.39	3876.21		1900.7	1343.12			148.65	8369.29
							0.03							1195.87						236.363	1488.92			1198.94			255.681	8614.77
							0.08							878.41							1099.92							4284.72
		SIT SUP CRT	SIT SUP SRT	SIT UNSUP CRT	SIT UNSUP SRT	UP CRT	UP SRT		SIT SUP CRT	SIT SUP SRT	SIT UNSUP CRT	SIT UNSUP SRT	UP CRT	UP SRT		SIT SUP CRT	SIT SUP SRT	SIT UNSUP CRT	SIT UNSUP SRT	UP CRT	UP SRT		SIT SUP CRT	SIT SUP SRT	SIT UNSUP CRT	SIT UNSUP SRT	UP CRT	UP SRT
		0.12	0.1	0.09	0.1	0.06	0.06		34.43	-142.14	81.29	29.53	510.31	61.6		85.43	188.01	107.62	14.51	846.65	122.98		918.25	2309.29	139.74	1099.97	3588.14	1188.27
		0.04	0.07	0.07	0.05	0.04	0.1		65.07	119.94	101.02	29.26	590.89	0.71		125.15	181.55	156.5	56.32	1032.52	169.32		1039.48	1579.97	424.74	1399.36	3788.81	3270.2
		0.07	0.02	0.01	0.1	0.04	0.1		-50.48	107.85	-24.17	-37.45	-319.05	-429.51		-36.56	394.92	-1.67	-72.03	-255.65	-112.53		370.83	2178.67	634.08	1078.28	2489.42	3329.93
		0.03	0.13	0.12	0.1	0.07	0.11		82.48	-12.47	82.66	86.81	1220.32	364		82.38	34.47	71.74	129.97	1499.89	532.21		432.73	1447.53	1654.68	854.38	3974.06	2074.25
		0.08	0.12	0.1	0.1	0.1	0.08		67.83	142.56	41.81	85.38	804.79	83.27		103.25	312.5	120.95	99.14	1837.85	113.53		1120.41	2439.19	849.16	550.13	5331.71	1985.5
		0.07		0.05	0.14		0.09		62.92		31.9	18.58		710.56		129.84		54.42	41.83		893.37		1011.94		139.17	1136.23		3938.92
		0.05		0.11	0.08		0.11		-112.88		-6.29	40.86		-70.46		-88.88		11.42	19.55		458.84		284.73		48.49	809.87		3356.74
				0.13	0.07						165.17	27.08						229.89	40.33						340.08	1181.43
		SIT SUP CRT	SIT SUP SRT	SIT UNSUP CRT	SIT UNSUP SRT	UP CRT	UP SRT		SIT SUP CRT	SIT SUP SRT	SIT UNSUP CRT	SIT UNSUP SRT	UP CRT	UP SRT		SIT SUP CRT	SIT SUP SRT	SIT UNSUP CRT	SIT UNSUP SRT	UP CRT	UP SRT		SIT SUP CRT	SIT SUP SRT	SIT UNSUP CRT	SIT UNSUP SRT	UP CRT	UP SRT
		0.07	0.13	0.14	0.11	0.13	0.09		123.07	142.93	-7.35	-23.28	826.17	127.72		912.54	975.78	131.12	8.21	4461.9	165.29		3895.07	11103.7	1019.04	223.58	9659.61	5018.12
		0.05	0.13	0.01	0.02	0.12	0.03		-81.39	597.07	-23.51	-93.24	72.61	50.12		825.99	1542.07	-12.63	-68.29	969.76	300.02		4120.7	6028.67	1149.44	40.57	23647.1	12633.3
		0.12	0.01	0.09	0.13	0.09	0.08		-234.31	-82.22	-386.71	129.95	269.46	81.89		843.01	851.85	-470	295.18	521.87	164.89		4603.26	6367.94	434.13	1053.76	5869.27	12806.5
		0.11		0.11		0.14	0.13		-717.02		-191.53	56.6	762.05	146.75		-53.5		-67.52	159.45	5516.98	494.89		3168.61	7833.44	1508.26	309.38	13174.8	5072.83
		0.1		0.04	0.1	0.06	0.07		-512.91		-111	-32.72	127.48	204.49		-703.69		-60.59	53.74	516.4	251.74		661.71		993.1	201.81	10272.5	805.82
		0.13			0.13	0.04	0.06		499.9			106.9	205.26	87.6		1843.9			210	533.46	238.49		12857.4		1020.79	595.79	1215.12	19880.3
		0.1					0.1		-112.93					178.63		1016.18			109.715	2086.73	1201.64		5043.89			404.148	10639.7	5685.11
							0.1							273.69							623.56		4907.24					12509.7
							0.03							114.02							1043.86							6638.96
		SIT SUP CRT	SIT SUP SRT	SIT UNSUP CRT	SIT UNSUP SRT	UP CRT	UP SRT		SIT SUP CRT	SIT SUP SRT	SIT UNSUP CRT	SIT UNSUP SRT	UP CRT	UP SRT		SIT SUP CRT	SIT SUP SRT	SIT UNSUP CRT	SIT UNSUP SRT	UP CRT	UP SRT		SIT SUP CRT	SIT SUP SRT	SIT UNSUP CRT	SIT UNSUP SRT	UP CRT	UP SRT
		0.02	0.01	0.03	0.01	0.06	0.11		5.77	-75.92	34.64	155.31	127.74	7.9		130.87	0.64	173.69	286.46	212.77	8.43		2092.66	893.68	366.46	343.91	6132.18	4166.97
		0.13	0.09	0.06	0.08	0.07	0.13		-42.9	-85.17	228.89	171.04	1582.98	852.72		101.26	-45.99	389.67	660.54	3637.16	1853.63		3388.91	1109.9	684.71	811.04	16379.2	5632.24
		0.12	0.02	0.08	0.09	0.1	0.02		-1264.33	193.29	64.56	409.14	2177.6	697.98		-1437.01	402.74	456.14	969.37	4222.93	1227.38		791.5	2168.61	760.38	1146.61	18412	6427.94
			0.06	0.02	0.03	0.04	0.08			402.54	176.29	0.42	964.95	1744.72			1152.54	402.34	456.63	2034.97	2963.99			5466.44	474.61	1130.19	10175.6	11805.4
			0.11	0.05	0.05	0.09	0.09			-23.55	367.69	122.62	658.93	951.3			268.94	556.09	823.38	2443.9	1703.29			5421.45	3686.79	1314.82	22661.8	15440.1
			0.01	0.02	0.11	0.03	0.06			85.21	341.59	124.68	1615.38	1535.01			922.18	582.07	433.73	2674.64	3045.91			2856.64	351.31	459.36	15942	18614.3
				0.01	0.02	0.12	0.08				123.3	63.26	424.75	1284.53				420.19	329.33	943.46	1913.34				777.24	678.61	14637	27692.4
					0.06		0.12					512.98		1615.34					851.58		2404.29					809.47		14372.7
					0.05		0.12					178.46		2310.81					233.12		3500.39					193.81		21298.2
					0.13							212.37							577.68							980.29
		0.05	0.03	0.04	0.12	0.09	0.03		81.81	180.81	227.93	318.06	233.92	72.06		345.47	561.23	563.44	1416.74	486.76	199.33		1764.11	1999.15	829.59	2846.7	1129.32	563.52
		0.08	0.05	0.01	0.04	0.08	0.03		215.62	90.9	196.34	240.23	296.4	-40.92		348.33	355.14	287.38	627.68	568.73	92.82		1987.75	1511.01	1373.75	1173.96	1559.06	1274.31
		0.07		0.02	0.02	0.04			111.11	159.98	-100.28	68.9	164.94	-238.27		236.8	323.9	21.99	193.92	297.17	-307.37		2897.33	1557.93	387.4	797.05	977.19	1711.51
		0.07	0.13	0.08	0.04	0.05	0.07		225.9	235.13	-11.91	83.25	62.15	-409.33		583.18	524.97	91.42	196.46	43.87	-472.08		2892.64	1577.64	1340.22	1177.59	1546.65	1276.97
		0.06	0.13	0.13	0.08	0.13	0.05		215.78	101.15	7.66	221.39	628.33	322.55		551.11	320.32	-19.2	494.41	952.91	842.46		2897.13	1918.67	591.13	910.44	3498.73	3048.63
			0.1		0.09	0.05	0.02			402.83		196.63	-181.04	432.25			665.42		301.02	-53.35	892.21		2487.79	3033.6	904.418	1271.07	1955.96	1950.46
			0.12		0.06	0.12				-187.05		281.03	221.56				191.36		370.49	239.57	207.895			1784.32		764.46	2030.56	1637.57
					0.08	0.12						282.76	427.07						482.1	914.98				1911.76		888.69	4744.31
					0.13							324.37							536.89	431.33						922.8	2180.22
		SIT SUP CRT	SIT SUP SRT	SIT UNSUP CRT	SIT UNSUP SRT	UP CRT	UP SRT		SIT SUP CRT	SIT SUP SRT	SIT UNSUP CRT	SIT UNSUP SRT	UP CRT	UP SRT		SIT SUP CRT	SIT SUP SRT	SIT UNSUP CRT	SIT UNSUP SRT	UP CRT	UP SRT		SIT SUP CRT	SIT SUP SRT	SIT UNSUP CRT	SIT UNSUP SRT	UP CRT	UP SRT
			0.12		0.09		0.11			42.31		-179.63		15.35			79.41		-252.43		28.49			107.58		-134.47		53.67
			0.08	0.12	0.1		0.09			-11.76	15.21	89.76		62.92			-15.85	57.55	158.15		83.22			94.34	126.38	277.02		78
				0.06		0.08					83.74		20.63					112.11		39.61					278.17		36.91
		0.06	0.11		0.1	0.02	0.03		359.2	44.1		-15.97	17.66	-0.78		827.76	79.3		48.86	24.24	-11.84		1042.73	324.57		150.2	6.81	7.72
			0.1	0.12						61.85	86.59						67.59	95.62						133.47	98.16
		0.12			0.12	0.02	0.07		259.38			-67.85	-18.57	17.03		687.37			-24.84	-14.98	3.83		1006.88			95.83	-17.97	-67.76
				0.02		0.07					-3.65		14.1					-47.51		-6.45					-67.28		-52.18
				0.03	0.05	0.12	0.08				-50.79	-20.04	-56.61	71.54				17.52	-22.2	-88.7	65.43				-11.25	216.53	-112.92	27.04
					0.07		0.14					30.09		67.07					90.47		87.26					156.66		26.87
				0.02	0.08		0.1				2.51	-18.9		-49.77				1.41	-39.18		-49.75				-24.97	-9.98		-66.36
		SIT SUP CRT	SIT SUP SRT	SIT UNSUP CRT	SIT UNSUP SRT	UP CRT	UP SRT		SIT SUP CRT	SIT SUP SRT	SIT UNSUP CRT	SIT UNSUP SRT	UP CRT	UP SRT		SIT SUP CRT	SIT SUP SRT	SIT UNSUP CRT	SIT UNSUP SRT	UP CRT	UP SRT		SIT SUP CRT	SIT SUP SRT	SIT UNSUP CRT	SIT UNSUP SRT	UP CRT	UP SRT
				0.09	0.07	0.08					269.24	55.14	-948.16					380.14	121.59	-653.55					425.04	357.29	-99.86
				0.13	0.09	0.13					-15.68	130.74	-31.87					-51.45	162.28	-3.76					84.18	183.85	318.5
		0.08			0.07				226.55			105.77				165.53			154.01				585.25			177.25
		0.1			0.13				-168.28			58.04				-236.97			38.24				2055.45			853.78
				0.11							12.72							52.8							539.21
				0.05	0.11	0.1					0.3	-52.24	-2362.77					-61.95	-65.76	-3567.57					-8.06	312.29	-3936.83
			0.07			0.11				-19.39			167.94				-10.46			1027.83				-88.19			3629.71
				0.07		0.14					105.89		-1039.29					169.84		-655.28					174.62		1650.78
		0.1	0.12	0.11					-1064.91	98.59	-42.77					-1632.44	514.3	-108.01					-330.91	903.26	223.41
				0.14		0.11	0.12				96.86			1491.88				109.84			1706.89				158.43			1105.6
		SIT SUP CRT	SIT SUP SRT	SIT UNSUP CRT	SIT UNSUP SRT	UP CRT	UP SRT		SIT SUP CRT	SIT SUP SRT	SIT UNSUP CRT	SIT UNSUP SRT	UP CRT	UP SRT		SIT SUP CRT	SIT SUP SRT	SIT UNSUP CRT	SIT UNSUP SRT	UP CRT	UP SRT		SIT SUP CRT	SIT SUP SRT	SIT UNSUP CRT	SIT UNSUP SRT	UP CRT	UP SRT
						0.1	0.05						260.25	104.92						1043.97	785.34						7390.93	3606.08
		0.06	0.12		0.11				71.56	51.16		127.34				340.44	121.44		301.59				2272.33	2313.64		453.24
			0.08		0.02	0.12				76.26		85.94	-513.23				49.2		64.4	-427.37				439.82		383.04	2073.35
		0.02	0.08	0.09	0.06				67.65	36.82	-108.97	-15.96				240.49	60.17	-162.42	23.54				3582.75	1422.01	17.25	296.8
		0.09			0.02		0.12		45.33			38.56		344.54		124.39			79.61		695.72		2389.34			138.45		2988.57
		0.11	0.02	0.13					-19.64	-35.76	120.72					54.26	-11	231.3					3225.24	1112.26	372.38
		0.07		0.1					76.33		139.19					133.78		226.69					2870.37		294.78
		0.03			0.13				16.07			84.28				252.54			107.94				3213.6			329.9
		0.08	0.01	0.1					-2.47	8.75	36.48					68.29	21.31	29.86					1309.95	190.92	152.09
		0.01		0.09		0.12			27.93		73.85		-465.07			122.35		127.19		-613.17			2369.89		341.21		1039.66
		SIT SUP CRT	SIT SUP SRT	SIT UNSUP CRT	SIT UNSUP SRT	UP CRT	UP SRT		SIT SUP CRT	SIT SUP SRT	SIT UNSUP CRT	SIT UNSUP SRT	UP CRT	UP SRT		SIT SUP CRT	SIT SUP SRT	SIT UNSUP CRT	SIT UNSUP SRT	UP CRT	UP SRT		SIT SUP CRT	SIT SUP SRT	SIT UNSUP CRT	SIT UNSUP SRT	UP CRT	UP SRT
			0.03	0.08		0.03	0.07			32.1	134.79		39.32	60.74			37.63	161.27		24.14	85.43			3297.88	124.28		4.39	7777.25
			0.06	0.03	0.06	0.06	0.1			980.57	61.67	17.15	23.91	306.86			1032.54	139.45	109.92	-19.74	832.92			4385.44	1112	256.17	-77.39	10565.5
		0.14		0.1			0.08		1227.45		-2.13			402.21		1213.5		34.98			636.94		1559.45		240.04			1297.59
					0.08	0.12						100.1	127.31						246.95	137.77						3246.69	197.97
		0.1	0.04	0.01	0.12	0.1			3210.59	-137.78	62.04	-22.45	66.75			4043.09	-292.56	173.8	1.91	74.05			1627.63	4080.88	297.6	-28.16	1783.54
			0.05				0.13			189.15				-105.3			728.86				-238.14			6570.11				19.44
		0.14		0.06	0.04	0.14	0.11		847.07		220.23	127.65	55.73	252.22		1184.42		409.7	323	67.23	253.24		7747.87		533.78	666.18	46.28	1423.25
			0.03	0.06	0.01	0.09	0.08		-53.54	-786.88	113.06	-9.78	62.91	49.09		1261.43	-92.09	251.23	35.98	80.29	23.11		8675.27	3169.41	460.35	188.49	160.17	2590.02
			0.09			0.07	0.11			550.71			30.61	170.69			2535.93			16.71	168.72			12008			-81.71	236.65
		0.12	0.07	0.1	0.12		0.09		-303.03	878.46	105.24	305.55		131.23		-1626.4	1896.63	295.61	629.47		152.31		-3796.46	8132.96	414.17	747.37		2649.1

## Sheet: DEL (2)
		LAT							APA 100							APA 150							CPA
		SIT SUP CRT	SIT SUP SRT	SIT UNSUP CRT	SIT UNSUP SRT	UP CRT	UP SRT		SIT SUP CRT	SIT SUP SRT	SIT UNSUP CRT	SIT UNSUP SRT	UP CRT	UP SRT		SIT SUP CRT	SIT SUP SRT	SIT UNSUP CRT	SIT UNSUP SRT	UP CRT	UP SRT		SIT SUP CRT	SIT SUP SRT	SIT UNSUP CRT	SIT UNSUP SRT	UP CRT	UP SRT
		0.02	0.1	0.05	0.09	0.09	0.05		27374.3	41694.4	8459.94	28306.7	26383.6	7985		59103.4	84873.6	18804.1	51100.6	61425	36988.3		127652	138869	86075	134146	147794	128341
		0.01	0.1	0.09	0.1	0.08	0.1		20026.1	40359.8	23389.8	22538.9	20943.7	27968		35502	77195.1	49651.1	40708.9	54631.7	54955.5		109491	138355	133902	101634	142789	159788
		0.02	0.03	0.09	0.03	0.04	0.05		47503.8	20209	25727.8	26511	18506.5	16343.5		66685.2	42272	42072.2	52273.6	42673.6	50874		119832	149423	106626	150012	124962	100672
			0.02	0.06	0.02	0.03	0.03		31634.7	30011.5	27426.9	24545.3	28537.9	18454.3		53763.5	53038	53641.1	44099	38896	51248		118992	215073	130496	85293.2	114161	111438
			0.02			0.09	0.05			37656.2	21251.1	25475.5	18390.7	18927.6			66015.2	41042.1	47045.6	35687	38430.4			155533	114275	117771	102742	101794
			0.03			0.08	0.02			30598.2			27076.5	21995.3			57408.2			55606.1	39716.2			135299			96808.1	72334.8
						0.1	0.09			33421.5			30354.2	28173.6			63467			54503.1	44481.4			155426			95184.8	105367
													24313.3	19978.2						49060.4	45242						117777	111391
		SIT SUP CRT	SIT SUP SRT	SIT UNSUP CRT	SIT UNSUP SRT	UP CRT	UP SRT		SIT SUP CRT	SIT SUP SRT	SIT UNSUP CRT	SIT UNSUP SRT	UP CRT	UP SRT		SIT SUP CRT	SIT SUP SRT	SIT UNSUP CRT	SIT UNSUP SRT	UP CRT	UP SRT		SIT SUP CRT	SIT SUP SRT	SIT UNSUP CRT	SIT UNSUP SRT	UP CRT	UP SRT
		0.06	0.03	0.1	0.08	0.02	0.1		11450.6	23827.4	40936.1	13857.7	31371.6	36127.4		40605.3	44754.9	67056.4	40836.3	65685.9	73772		139195	73604.5	56489.8	68112.6	78032.3	78584.4
		0.04	0.08	0.02	0.09	0.07	0.09		10617.9	15103.9	27746.7	42558.8	49961.1	51643		21061.9	43586.7	75481.1	71440.7	94478.1	92760.1		57408.8	88573.2	88349.6	55740.3	100280	97414
		0.05	0.04	0.02	0.03	0.1	0.02		12954.3	904.29	34547.3	24157.6	42483.9	48411.1		40024.1	1467.71	68205.9	49637.9	90437.6	79759.9		88405.6	38421.7	68985.6	65091.9	105219	94924.4
		0.09		0.01	0.09	0.02	0.02		22273.9	13278.5	39705.4	32772.9	43934.9	62384.8		59891.7	29936.4	74886	64877	87352.2	92432.4		93493.2	66866.5	69903	73458.7	122044	104906
		0.06		0.04	0.08	0.04	0.03		17503.5		42405.2	27137.6	41058.8	57451.3		45225.2		74688.5	80508.1	97540.2	90201.7		70372.5		61855.4	105237	102293	65416.7
					0.02	0.04			14960.1		37068.1	53917.1	51876.6	51203.5		41361.6		72063.6	96469	94495.5	85785.2		89775.1		69116.7	69177.9	82321.1	88249.2
					0.04							42365.7	43447.8						88123.1	88331.6						101454	98364.8
					0.1							56590.7							98952.7							77189.2
												36669.8							73855.6							76932.8
		SIT SUP CRT	SIT SUP SRT	SIT UNSUP CRT	SIT UNSUP SRT	UP CRT	UP SRT		SIT SUP CRT	SIT SUP SRT	SIT UNSUP CRT	SIT UNSUP SRT	UP CRT	UP SRT		SIT SUP CRT	SIT SUP SRT	SIT UNSUP CRT	SIT UNSUP SRT	UP CRT	UP SRT		SIT SUP CRT	SIT SUP SRT	SIT UNSUP CRT	SIT UNSUP SRT	UP CRT	UP SRT
		0.1	0.08	0.02	0.03	0.04	0.08		24436.4	32204.3	9974.83	34718.8	22139.4	22588.7		43351.1	64593.6	38850.7	57256	41776.6	39911.5		34044.3	51225.3	51181.2	40010.3	38905.8	33197.4
		0.01	0.02	0.01	0.01	0.02	0.01		31405.3	18918.3	15076	31953.6	7796.71	18008.8		66546.8	38677.8	32544.2	49312.6	19954	31353.9		64347.3	47047.9	44144.2	40377.7	87336.7	29147.1
		0.02	0.01	0.07	0.03	0.01	0.03		7885.6	35726.3	11963	32185.3	21196	19835.2		26978.9	67413.1	29981.8	50638.7	53662.2	38552.4		61360.9	57512.8	58712.4	34241.8	48326.1	44330.6
		0.1	0.09	0.01	0.01	0.03	0.1		16656.7	35377.2	13664.6	39442.6	19034.6	25237		44224.4	64392.2	47472.3	60934.1	42371.1	40285.3		74306.9	59164.9	83980.5	39408.6	54815.4	36632.2
		0.04	0.02	0.01	0.02	0.03	0.02		23840	35464.6	22167.4	16955.1	19042.5	30432.7		49770.9	65399	51601.1	44168.8	49062.9	52243.8		53117.5	62617.3	55842.8	52833.5	48459.9	43872.3
		0.1		0.01	0.01	0.01	0.03		22295.5	31538.1	17983.8	23723.6	21131.5	30453.9		43000.8	60095.1	39931.4	41888.8	45768.1	49238.1		55676.1	55513.7	44169.5	42204.3	52385.9	38307.6
		0.04		0.08		0.03	0.02		31423.3		18316.8	29829.8	42729	24421.9		56469		40264.7	50699.8	65181.7	48130.1		43255.1		59463.8	41512.7	44574.8	45758.1
				0.03					22563.3		29084.5		21867.1	24425.5		47191.7		52685		45396.7	42816.4		55158.3		58253.6		53543.5	38749.3
											17278.9							41666.4							56968.5
		SIT SUP CRT	SIT SUP SRT	SIT UNSUP CRT	SIT UNSUP SRT	UP CRT	UP SRT		SIT SUP CRT	SIT SUP SRT	SIT UNSUP CRT	SIT UNSUP SRT	UP CRT	UP SRT		SIT SUP CRT	SIT SUP SRT	SIT UNSUP CRT	SIT UNSUP SRT	UP CRT	UP SRT		SIT SUP CRT	SIT SUP SRT	SIT UNSUP CRT	SIT UNSUP SRT	UP CRT	UP SRT
		0.1	0.07	0.02	0.03	0.03	0.04		47551.8	70855.4	86937.7	19411.7	106923	41794.4		105890	141635	166679	54504.6	162696	102191		114694	166266	220183	176773	107809	169529
		0.1	0.1	0.02	0.08	0.09	0.04		50959.4	48632.7	65486.1	31128.6	80292.3	80597.9		124721	108311	144714	72253	139679	160148		215875	110197	187495	169538	189376	150372
		0.1	0.1	0.02	0.02	0.05	0.02		86418.9	27774.6	90561.2	44442.9	4687.62	80001.3		151436	103502	171990	107212	5531.26	143805		134421	184822	233464	223294	168158	121296
		0.08	0.04	0.01	0.1	0.06	0.0333333		35807.5	88568.9	101595	70660.6	40218.7	67464.5		98301.6	152208	198029	127195	42004.6	135381		137341	185561	258945	127928	221367	147066
		0.01	0.04	0.01	0.04	0.0825			89361.3	65244	107758	111653	58030.3			155351	139525	223882	206862	87477.7			127880	201757	299501	230594	171678
		0.01	0.01	0.016	0.014				80374.6	60215.1	90467.6	55459.4				140090	129037	181059	113605				120349	169721	239918	185625
		0.1							65078.9							129298							141760
		SIT SUP CRT	SIT SUP SRT	SIT UNSUP CRT	SIT UNSUP SRT	UP CRT	UP SRT		SIT SUP CRT	SIT SUP SRT	SIT UNSUP CRT	SIT UNSUP SRT	UP CRT	UP SRT		SIT SUP CRT	SIT SUP SRT	SIT UNSUP CRT	SIT UNSUP SRT	UP CRT	UP SRT		SIT SUP CRT	SIT SUP SRT	SIT UNSUP CRT	SIT UNSUP SRT	UP CRT	UP SRT
		0.02	0.1	0.09	0.01	0.01	0.02		21062.5	29273	5383.87	17682	11591.4	35830.5		49375.4	46042.7	20289.1	40460.2	25787.2	85333.5		96394.6	181105	103573	190458	110641	100317
		0.07	0.04	0.02	0.03	0.03	0.08		14079.8	33320.9	31168.9	33350.1	24916.1	13664.7		41292.9	85413.6	58457.3	92787.4	55982.9	43928.8		110235	199340	195993	190279	61507.9	148899
		0.01	0.04	0.02	0.03	0.02	0.02		30003.9	28237.5	34598.3	34839.6	25216.8	45641.5		61157.6	67914.1	65771.3	62624.9	71122.5	93937.5		227144	200398	118898	169276	112177	127478
		0.01	0.03	0.06	0.01	0.06	0.01		18028.9	17253.1	20925.5	21506.2	25870.1	26747.1		37793.5	33029.4	74008.6	82522.2	69088.4	63382.8		180476	192022	180045	196432	141035	85761.7
		0.02	0.01		0.08	0.1	0.03		17214.4	19812.3	23019.2	16726.3	15367.8	34257		41391.2	41922.6	54631.6	40240.8	65656.6	74513.3		206867	179476	149627	167089	128756	89559.9
		0.03			0.01	0.1	0.03		31369.2	25579.4		50662.2	21956.2	35832.5		64688.4	54864.5		108331	44652.1	83946.7		90571.3	190468		164546	51807.2	90491.1
		0.02			0.03	0.02			30768.2			41975.9	20449.5	31995.6		75575.5			111222	44061.8	74173.8		131995			178869	64336.9	107084
					0.02				23218.1			58064.7	20766.8			53039.2			123498	53764.5			149098			154467	95751.6
												34350.9							82710.7							176427
		0.04	0.02	0.01	0.02	0.07	0.01		18287.9	35132.3	15157.9	11365.9	19718.9	18705.6		45010.4	60612.6	31485.8	40467.9	44275.9	33598.1		81401.6	52865.4	54331.2	65995.3	68367.6	66240.2
		0.1	0.01	0.05	0.08	0.06	0.1		34913.4	28022.6	23626.8	16008.1	7061.9	15523.7		70392.1	52210	50507.6	44216.9	8082.74	45773.9		66733.2	61489.6	89750.1	61747.6	60496.2	82486.5
		0.09	0.01	0.02	0.03	0.08	0.01		31263.1	36897.5	11591.9	22426.4	21576	27922.2		44851.7	62594.7	45712.4	54378.6	51309.6	63894.9		53526.7	54421	71607.6	55917.7	60643.1	81749.9
		0.04	0.02	0.05		0.09	0.04		34910.3	20779.3	13283.9	16600.1	15794.9	14356.9		59499.7	43706.8	41522.6	46354.5	39553.3	40197.6		56068.7	85065.7	79707.5	61220.2	67679.6	58215.3
		0.1	0.1	0.08		0.1	0.08		33045.4	31833.1	19165.7		18341.1	15743.3		63024.3	57491.8	48101.1		36137.9	37583		64481.2	59563.7	55176.2		74384.5	77934.2
		0.07	0.1	0.1		0.1	0.1		41964.8	35269.5	12454.3		27255.2	14351.4		76769.2	76865.6	37355		52103.2	46645.6		61899.8	75101.7	81052.3		76941.1	79826.8
		0.02		0.1					30483.5	31322.4	16043.7		18291.3	17767.2		63262.6	58913.6	34280.3		38577.1	44615.5		63651.6	64751.2	35234.1		68085.3	74408.8
				0.01					32124		24612.9					60401.4		42966.8					63966.1		32201.5
											16992.1							41491.5							62382.6
		SIT SUP CRT	SIT SUP SRT	SIT UNSUP CRT	SIT UNSUP SRT	UP CRT	UP SRT		SIT SUP CRT	SIT SUP SRT	SIT UNSUP CRT	SIT UNSUP SRT	UP CRT	UP SRT		SIT SUP CRT	SIT SUP SRT	SIT UNSUP CRT	SIT UNSUP SRT	UP CRT	UP SRT		SIT SUP CRT	SIT SUP SRT	SIT UNSUP CRT	SIT UNSUP SRT	UP CRT	UP SRT
			0.1	0.04	0.02	0.02	0.07			6925.62	5064.32	5451.96	12439.6	5792.9			14184.2	7169.04	9472.94	20171	16567.8			35930.1	15109.9	17682.5	37539.7	36201.5
		0.06	0.03	0.02	0.03		0.02		9420.31	10892.9	7799.75	7547.12		9968.15		17457.5	20951.5	13567.3	9641.39		20595.8		40293.3	34953.6	45473.9	29271.2		71937
		0.02	0.02	0.03	0.03	0.1	0.02		10556.9	10588.7	10286.9	9034.07	7648.8	10848.4		17957.5	15796.8	17336.9	18336.1	16995.5	21188.7		33461.5	38239.1	41968.1	43273	47339.4	45743.6
						0.03							13257.9							24904.2							54556.8
		0.02		0.04	0.02		0.04		12522.5		10874.4	10576.1		9835.24		17867.5		20658.1	18232		21027.1		49854.1		52322.7	40834.6		34451.3
						0.03	0.02						13992.5	12038						27196.9	20024.4						43417.1	39520
		0.02			0.02	0.02	0.1		14677			6887.24	12818	16210		23881.5			13361.6	23758.2	22474.5		48580.5			38055	68669.2	52201.5
		0.03	0.1	0.01		0.04	0.02		10884.1	19503.4	16201.4		10037.7	10099.8		15729.4	31872.9	24267.8		17766.7	17488.2		48421.8	47642.2	53628.1		51842.2	63063.6
		0.04	0.03	0.03	0.04	0.03	0.02		14416.5	16887.2	13739.2	18710.7	21252.1	13062.4		24320.2	23468.9	20941.5	24550.6	34862.9	21921.7		52120.6	51333.4	41729.4	45895.3	72501.5	45525.2
				0.01	0.01		0.03				8161.02	13919.3		14997.1				13799	19892.4		22756.5				45326.4	39423.8		37564.7
		SIT SUP CRT	SIT SUP SRT	SIT UNSUP CRT	SIT UNSUP SRT	UP CRT	UP SRT		SIT SUP CRT	SIT SUP SRT	SIT UNSUP CRT	SIT UNSUP SRT	UP CRT	UP SRT		SIT SUP CRT	SIT SUP SRT	SIT UNSUP CRT	SIT UNSUP SRT	UP CRT	UP SRT		SIT SUP CRT	SIT SUP SRT	SIT UNSUP CRT	SIT UNSUP SRT	UP CRT	UP SRT
		0.08	0.1	0.09	0.1	0.1	0.01		7712.26	8120.97	8167.89	15951.2	18826.8	11642.3		17568.4	17514.5	17337.3	25695.6	33922.5	25320.1		78026.9	103436	58210.2	46952.4	112837	94137.1
		0.1	0.01	0.07	0.06		0.04		9022.65	12074.7	9750.7	10480.3		7569.72		18319.1	21464.7	26419.8	15876.6		21532.8		65531.5	92840.5	73891.4	45209.9		81811.7
		0.02			0.02	0.02	0.01		13375.5			7224.33	8441.87	22114.3		24528.7			11412.8	31983.7	40431.9		77094.6			39294.6	70487	92109
		0.01	0.09		0.09	0.08	0.08		19796.8	7342.74		10592.2	15458.5	12190		34360.3	12005.3		21327.6	35704.8	21599.1		89718.3	58519		65188.3	80970.6	81879.2
		0.07	0.02		0.08	0.08			13734	16548		13157	15523.4			27745.7	24933		23524.2	29133.9			106550	103282		74099.6	98777.3
			0.1	0.09	0.1	0.1				12714.7	11936.5	13713	9887.93				38829	19594.9	20561.6	23093.7				90792	56053.3	58284.8	82293.9
		0.01	0.04	0.1	0.08	0.05			16715.1	8582.57	16763.8	8357.26	14033.9			29462.3	14112.4	23299.5	23962.2	39572.1			84979.8	68626.9	39413.7	77738.1	120105
		0.06	0.01	0.1	0.1	0.1	0.07		12488.6	7419.87	10020.3	34.38	17328.7	12795.3		22123.5	22908.9	19587.6	533.42	36091.5	27531.7		56329.3	91100	53156.7	13523.7	99379.5	77870.4
		0.09	0.1	0.08	0.02	0.1			20269	9645.11	19837.8	11561.4	16083.9			49929.2	19157.3	28861.1	18625	30437			115181	82602.8	86176.7	70452.3	88954.4
		0.01	0.07	0.08					13727.9	14615.8	10632.8					25640	26478.9	15136.1					56406	58507.8	38251
		SIT SUP CRT	SIT SUP SRT	SIT UNSUP CRT	SIT UNSUP SRT	UP CRT	UP SRT		SIT SUP CRT	SIT SUP SRT	SIT UNSUP CRT	SIT UNSUP SRT	UP CRT	UP SRT		SIT SUP CRT	SIT SUP SRT	SIT UNSUP CRT	SIT UNSUP SRT	UP CRT	UP SRT		SIT SUP CRT	SIT SUP SRT	SIT UNSUP CRT	SIT UNSUP SRT	UP CRT	UP SRT
		0.03	0.06	0.01	0.05	0.1	0.1		29170.2	4912.01	21618.5	11354.1	19406.6	25265.9		52914.9	23739.6	46244.5	22111.1	39050.1	52847.6		106767	133182	103977	136032	96711.2	104459
		0.04	0.03			0.03	0.01		42512	36139.3			21664.3	14610.1		76713.8	65068.5			47385	50134.9		92192.4	113587			77505.2	103217
		0.01	0.02	0.1		0.1	0.1		28338.5	26500.2	23896.2		13923.1	12689.9		53640.3	76491.7	52190.4		40167.1	43722.7		106250	150162	86361.3		101217	124579
		0.03	0.01		0.03	0.03	0.1		49010	16113.3		25715.1	13306.6	17315.4		84498	50978.5		46251.5	28371	49918.4		92869.3	161954		93112.2	87973.4	128651
		0.01	0.03		0.03	0.1	0.01		34205	14218.7		27520	22822.7	13147.1		86009.4	41964.4		61915.7	45069.8	45878		117538	122404		101882	94466.7	109673
			0.01		0.04		0.02			35498.9		24725.6		20497.5			70004.6		43979.6		51548.3			128153		137685		92480.9
			0.01		0.02	0.01	0.01			25041.2		35020.8	17824.9	9121.23			52828.5		74587.6	35049	22586.8			122312		97349.3	85292.3	97545.1
		0.03			0.03	0.08	0.03		51355.6			40044.7	19256.3	21009.6		84277.4			90827.8	55978.8	39354.4		114933			107543	111223	71776
		0.03			0.02		0.02		25023.4			50413.2		14791.2		59790.8			89671.5		35858.5		79142.6			122774		87915.1
		0.03	0.03	0.04		0.03	0.02		70220.2	19646.2	12054.6		12765.2	19090.4		105726	56436.3	27344.3		28964.4	45519.5		100167	143481	123016		110073	98368.9
		SIT SUP CRT	SIT SUP SRT	SIT UNSUP CRT	SIT UNSUP SRT	UP CRT	UP SRT		SIT SUP CRT	SIT SUP SRT	SIT UNSUP CRT	SIT UNSUP SRT	UP CRT	UP SRT		SIT SUP CRT	SIT SUP SRT	SIT UNSUP CRT	SIT UNSUP SRT	UP CRT	UP SRT		SIT SUP CRT	SIT SUP SRT	SIT UNSUP CRT	SIT UNSUP SRT	UP CRT	UP SRT
		0.03	0.02		0.03	0.08	0.01		35750.7	5053.09		25332.7	10580.4	21058.2		53161.7	26368.5		39243.4	39395.8	50188.1		110857	82459.5		109293	109252	72894.7
			0.1	0.03	0.01	0.1	0.01			22759.8	29661.3	24804.8	36719.4	32596.9			54339.6	67991	46773.7	66431.5	71402.6			130520	126172	103290	74121.2	81823.8
		0.01	0.09	0.03	0.1				80.69	29715.6	22369.8	9340.17				101.8	42774.9	53489.3	12151.7				5526.97	120211	107053	44390
			0.03		0.03	0.02	0.05			24289		12002.5	24660.1	44184.1			50707		20338.8	49400.1	82485.2			129397		89215.5	115146	115575
		0.02			0.02	0.03	0.09		-29902.8			8557.54	19993.4	13050		-38877			17173.5	50118.1	33272.8		-20851.2			71583.5	113322	83773.4
			0.02		0.07	0.09				15195.5		15206.9	13192.5				25700.2		28651.4	27383.3				95535.4		115744	80539.8
			0.09		0.03	0.03	0.03			3307.59		20750.4	13764.4	28879.4			13162.7		36612	27614.9	59412.4			99057.9		96471.1	62365.8	78334.8
		0.03	0.1				0.02		27431.4	18841.1				28074.5		47330.3	32368.5				57595.4		119104	106089				67317.5
			0.03				0.03			26768.6				21797.9			54782.9				39585.3			95474.7				150182
			0.09	0.04		0.03	0.1			22562.3	19740.5		25740.5	18479.5			38828.5	32078.1		49967.3	38491.9			103362	99120.2		78874.3	89366.9

## Sheet: KINEM (2)
	1
		Reaction Time				Movement Duration				Velocity peak
		0.29	0.29	0.24		0.27	0.25	0.22		0.27	0.25	0.23
		0.28	0.22	0.21		0.4	0.19	0.25		0.2	0.24	0.37
		0.26	0.22	0.36		0.25	0.23	0.27		0.33	0.19	0.24
		0.32	0.23	0.25		0.5	0.52	0.51		0.53	0.54	0.52
		0.56	0.54	0.51		0.57	0.58	0.5		0.54	0.56	0.49
		0.52	0.55	0.48		0.48	0.6	0.49		0.57	0.64	0.5
		0.5	0.59	0.53		0.52	0.63	0.53		0.62	0.55	0.58
		0.55	0.53	0.57		0.53	0.52	0.54		0.51	0.51	0.56
		0.5	0.48	0.58		0.6	0.52	0.6		0.57	0.51	0.6
		0.5	0.38	0.59		0.59	0.48	0.54		0.51	0.44	0.54
	2
		0.29	0.34	0.29		0.28	0.2	0.21		0.21	0.1	0.18
		0.22	0.2	0.24		0.2	0.16	0.19		0.21	0.22	0.24
		0.01	0.21	0.24		0.23	0.23	0.25		0.2		0.25
		0.19	0.22	0.24		0.4	0.43	0.42		0.42	0.38	0.38
		0.45	0.36	0.33		0.45	0.33	0.32		0.46	0.38	0.32
		0.38	0.32	0.34		0.62	0.32	0.36		0.4	0.28	0.33
		0.45	0.58	0.31		0.43	0.33	0.33		0.73	0.72	0.73
		0.69	0.67	0.75		0.74	0.74	0.85		0.7	0.75	0.79
		0.69	0.76	0.8		0.78	0.77	0.86		0.7	0.77	0.75
		0.72	1.54	0.85		0.71	0.68	0.77		0.72	0.78	0.77
	3
		0.35	0.3	0.26		0.2	0.19	0.2		0.25	0.19	0.27
		0.31	0.18	0.19		0.18	0.2	0.18		0.3	0.2	0.25
		0.32	0.2	0.18		0.19	0.19	0.22		0.21	0.15	0.23
		0.321	0.2	0.23		0.29	0.33	0.32		0.33	0.36	0.33
		0.34	0.36	0.33		0.32	0.33	0.35		0.3	0.3	0.35
		0.32	0.33	0.33		0.31	0.31	0.35		0.3	0.33	0.33
		0.35	0.33	0.33		0.3	0.33	0.33		0.73	0.77	0.75
		0.74	0.72	0.8		0.75	0.72	0.78		0.74	0.8	0.77
		0.35				0.72				0.76	0.79	0.74
		0.56		0.8		0.73				0.76	0.75	0.77
	4
		0.21	0.27	0.23		0.24	0.22	0.19		0.19	0.22	0.1
		0.21	0.21	0.17		0.19	0.22	0.21		0.19	0.22	0.19
		0.22	0.18	0.21		0.25	0.19	0.14		0.18	0.21	0.22
		0.2	0.21	0.23		0.42	0.51	0.38		0.38	0.52	0.37
		0.41	0.42	0.37		0.41	0.46	0.37		0.43	0.42	0.44
		0.42	0.44	0.41		0.41	0.39	0.33		0.41	0.39	0.37
		0.39	0.43	0.38		0.4	0.38	0.38		0.7	0.64	0.71
		0.77	0.59	0.77		0.68	0.61	0.77		0.67	0.7	0.78
		0.71	0.71	0.64		0.69	0.66	0.69		0.68	1.37	0.79
		0.31				0.71				0.71
	5
		0.37	0.28	0.48		0.36	0.28	0.25		0.29	0.24	0.21
		0.23	0.26	0.27		0.31	0.18	0.25		0.36	0.33	0.24
		0.31	0.35	0.23		0.26	0.27	0.24		0.3	0.26	0.26
		0.28	0.22	0.24		0.52	0.47	0.41		0.43	0.37	0.4
		0.43	0.36	0.41		0.48	0.4	0.35		0.42	0.43	0.38
		0.42	0.36	0.4		0.38	0.36	0.41		0.44	0.34	0.36
		0.38	0.41	0.36		0.38	0.35	0.37		0.55	0.63	0.75
		0.63	0.67	0.77		0.65	0.7	0.7		0.65	0.7	0.74
		0.66	0.73	0.74		0.65	0.7	0.76		0.72	0.72	0.68
		0.63	0.7	0.73		0.69	0.62	0.73		0.73	0.72	0.71
	6
		0.23	0.27	0.25		0.21	0.19	0.21		0.24	0.19	0.18
		0.19	0.21	0.19		0.19	0.17	0.18		0.2	0.17	0.18
		0.32	0.19	0.19		0.19	0.2	0.16		0.21	0.18	0.22
		0.18	0.17	0.2		0.37	0.35	0.43		0.37	0.31	0.43
		0.37	0.33	0.44		0.37	0.32	0.37		0.36	0.34	0.44
		0.34	0.32	0.34		0.36	0.34	0.36		0.36	0.35	0.38
		0.34	0.33	0.39		0.34	0.34	0.46		0.75	0.7	0.72
		0.67	0.72	0.68		0.75	0.69	0.64		0.69	0.75	0.7
		0.71	0.76	0.69		0.71	0.73	0.69		0.72	0.72	0.66
		0.32
	7
		0.33	0.36	0.28		0.47	0.26	0.29		0.25	0.3	0.25
		0.23	0.32	0.22		0.21	0.26	0.24		0.32	0.25	0.28
		0.23	0.26	0.25		0.21	0.24	0.29		0.2	0.27	0.27
		0.27	0.23	0.24		0.68	0.91	0.69		0.78	0.83	0.66
		0.73	0.78	0.72		0.66	0.7	0.78		0.76	0.78	0.78
		0.71	0.76	0.71		0.68	0.8	0.75		0.77	0.75	0.7
		0.7	0.76	0.75		0.66	0.73	0.73		0.42	0.28	0.39
		0.36	0.33	0.43		0.38	0.35	0.4		0.38	0.42	0.37
		0.38	0.37	0.37		0.37	0.35	0.37		0.33	0.33	0.36
		0.35	0.32	0.4		0.39	0.34	0.37		0.39	0.35	0.38
	8
		0.27	0.3	0.29		0.18	0.22	0.26		0.52	0.22	0.2
		0.18	0.16	0.22		0.19	0.19	0.24		0.41	0.19	0.25
		0.26	0.18	0.2		0.26	0.01	0.23		0.45	0.23	0.22
		0.2	0.21	0.09		0.7	0.67	0.53		0.65	0.73	0.45
		0.53	0.83	0.5		0.64	0.61	0.56		0.54	0.51	0.47
		0.49	0.63	0.46		0.88	0.62	0.54		0.66	0.85	0.45
		0.68	0.67	0.53		0.67	0.58	0.73		0.45	0.39	0.53
		0.47	0.4	0.57		0.53	0.32	0.52		0.49	0.42	0.48
		0.51	0.51	0.52		0.59	0.45	0.59		0.36	0.4	0.54
		0.46	0.4	0.6		0.39	0.43	0.57		0.35	0.42	0.52
	9
		0.31	0.29	0.3		0.26	0.38	0.24		0.51	0.27	0.19
		0.23	0.24	0.22		0.23	0.26	0.24		0.58	0.23	0.23
		0.23	0.23	0.23		0.2	0.24	0.26		0.31	0.24	0.24
		0.28	0.26	0.22		0.46	0.47	0.43		0.42	0.38	0.41
		0.48	0.44	0.44		0.48	0.47	0.46		0.56	0.35	0.46
		0.47	0.47	0.41		0.41	0.41	0.48		0.46	0.4	0.43
		0.48	0.41	0.44		0.54	0.43	0.49		0.55	0.61	0.62
		0.62	0.53	0.65		0.61	0.51	0.67		0.62	0.5	0.61
		0.52	0.6	0.55		0.58	0.57	0.62		0.58	0.63	0.55
		0.55	0.6	0.52		0.54	0.54	0.57		0.48	0.54	0.59
	10
		0.27	0.68	0.32		0.23	0.25	0.26		0.51	0.24	0.23
		0.22	0.63	0.22		0.23	0.32	0.23		0.57		0.2
		0.06	0.6	0.18		0.27	0.23	0.17		0.55	0.22
		0.27	0.61	0.16		0.54	0.54	0.39		0.48	0.48	0.35
		0.48	0.6	0.47		0.42	0.51	0.43		0.57	0.59	0.48
		0.54	0.55	0.48		0.61	0.49	0.43		0.53	0.46	0.42
		0.53	0.58	0.48		0.5	0.58	0.46		0.5	0.49	0.61
		0.56	0.62	0.66		0.55	0.49	0.62		0.56	0.54	0.6
		0.55	0.68	0.58		0.54	0.45	0.62		0.53	0.54	0.62
		0.55	0.63	0.54		0.53	0.51	0.58		0.53	0.49	0.61
